# Supplementary material for: Confusion of Möbius aromaticity: disruption of annulenic pathway in singly N-confused [28]hexaphyrin and its mono-Pd(ii) complex
Source: Royal Society of Chemistry journal article supplement (doi:10.1039/c2dt30306j), 2012-01-01
Supplement: c2dt30306j.pdf [file c2dt30306j.pdf]

Supplementary information  
for  
**Confusion of Möbius aromaticity: Disruption of annulenic pathway in  
singly N-confused [28]hexaphyrin and its mono-Pd(II) complex**

Sabapathi Gokulnath,<sup>a</sup> Motoki Toganoh,<sup>a</sup> Keisuke Yamaguchi,<sup>a</sup> Shigeki Mori,<sup>b</sup> Hidemitsu Uno,<sup>b</sup> and  
Hiroyuki Furuta<sup>\*a,c</sup>

<sup>a</sup>*Department of Chemistry and Biochemistry, Graduate School of Engineering,  
Kyushu University, 744 Moto-oka, Nishi-ku, Fukuoka 819-0395, Japan.*

<sup>b</sup>*Integrated Center for Sciences and Graduate School of Science and Engineering, Ehime  
University, Matsuyama 790-8577, Japan*

<sup>c</sup>*International Research Center for Molecular Systems, Kyushu University*

*E-mail: hfuruta@cstf.kyushu-u.ac.jp*

|                                                                                                                                     |         |
|-------------------------------------------------------------------------------------------------------------------------------------|---------|
| <b>Table of Contents</b> .....                                                                                                      | S1      |
| <b>Fig. S1:</b> UV/Vis/NIR absorption spectra of <b>4–6</b> in CH <sub>2</sub> Cl <sub>2</sub> .....                                | S2      |
| <b>Fig. S2:</b> UV/Vis/NIR absorption spectra for redox reaction between of <b>4</b> and <b>5</b> .....                             | S2      |
| <b>Fig. S3:</b> MALDI-TOF-MS spectra of <b>4</b> and <b>5</b> .....                                                                 | S3      |
| <b>Fig. S4:</b> MALDI-TOF-MS spectra of <b>6</b> .....                                                                              | S4      |
| <b>Fig. S5:</b> Variable temperature <sup>1</sup> H NMR spectra of <b>4</b> in CDCl <sub>3</sub> .....                              | S5      |
| <b>Fig. S6:</b> Variable temperature <sup>1</sup> H NMR spectra of <b>5</b> in DMF- <i>d</i> <sub>7</sub> .....                     | S6      |
| <b>Fig. S7:</b> Variable temperature <sup>1</sup> H NMR spectra of <b>5</b> in THF- <i>d</i> <sub>8</sub> .....                     | S7      |
| <b>Fig. S8:</b> <sup>1</sup> H NMR spectra of <b>6</b> in CDCl <sub>3</sub> at 25 °C .....                                          | S8      |
| <b>Fig. S9:</b> <sup>1</sup> H- <sup>1</sup> H COSY spectra of <b>4</b> in CDCl <sub>3</sub> at –60 °C .....                        | S9      |
| <b>Fig. S10:</b> <sup>1</sup> H- <sup>1</sup> H COSY spectra of <b>5</b> at –60 °C and <b>6</b> at 25 °C in CDCl <sub>3</sub> ..... | S10     |
| <b>Fig. S11:</b> <sup>13</sup> C NMR spectra of <b>4</b> and <b>5</b> in CDCl <sub>3</sub> .....                                    | S11     |
| <b>Fig. S12:</b> <sup>19</sup> F NMR spectra of <b>4</b> and <b>5</b> in CDCl <sub>3</sub> .....                                    | S12     |
| <b>Fig. S13:</b> Detailed structural data for <b>4-6</b> .....                                                                      | S13     |
| <b>Fig. S14:</b> Evaluation of aromaticity in hexaphyrins <b>1–6</b> .....                                                          | S14     |
| <b>Cartesian coordinates for the optimized structures</b> .....                                                                     | S15–S28 |

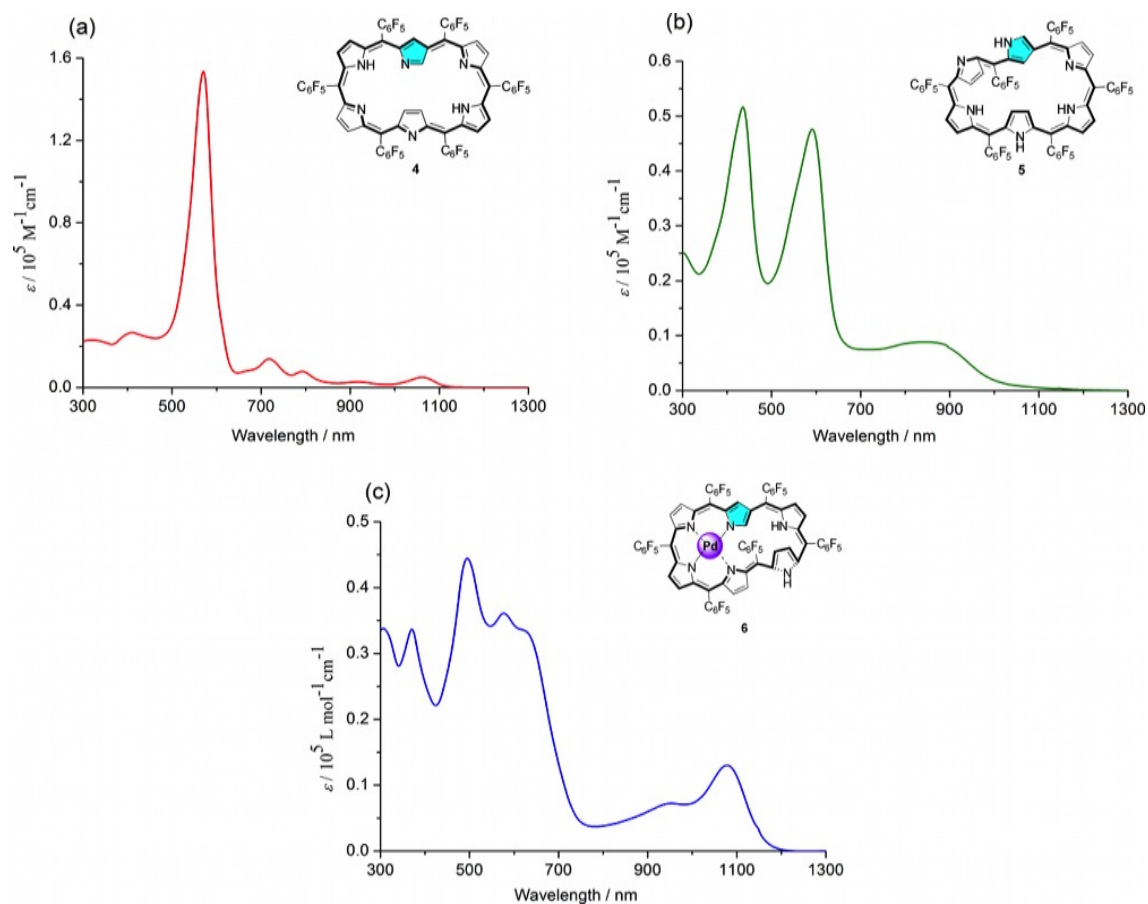

**Fig. S1** UV/Vis/NIR absorption spectra of (a) **4**, (b) **5**, and (c) **6** in  $\text{CH}_2\text{Cl}_2$ .

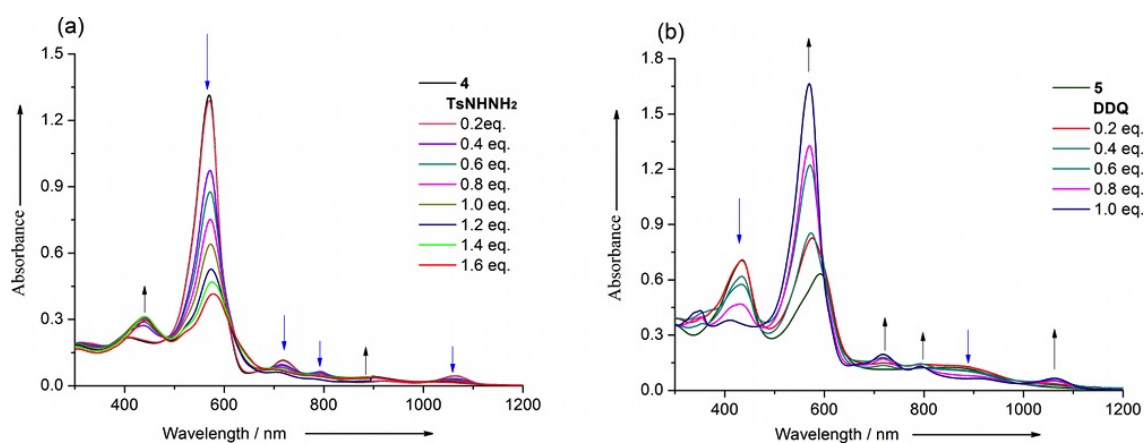

**Fig. S2** UV/Vis/NIR absorption spectra for redox reaction between **4** and **5**: (a) reduction of **4** and (b) oxidation of **5** in  $\text{CH}_2\text{Cl}_2$ .

(a)

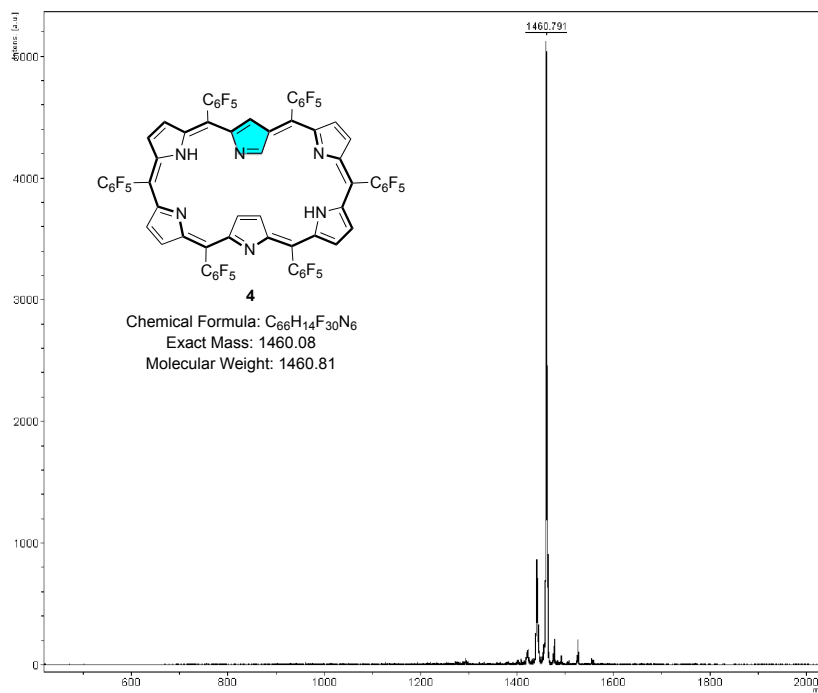

(b)

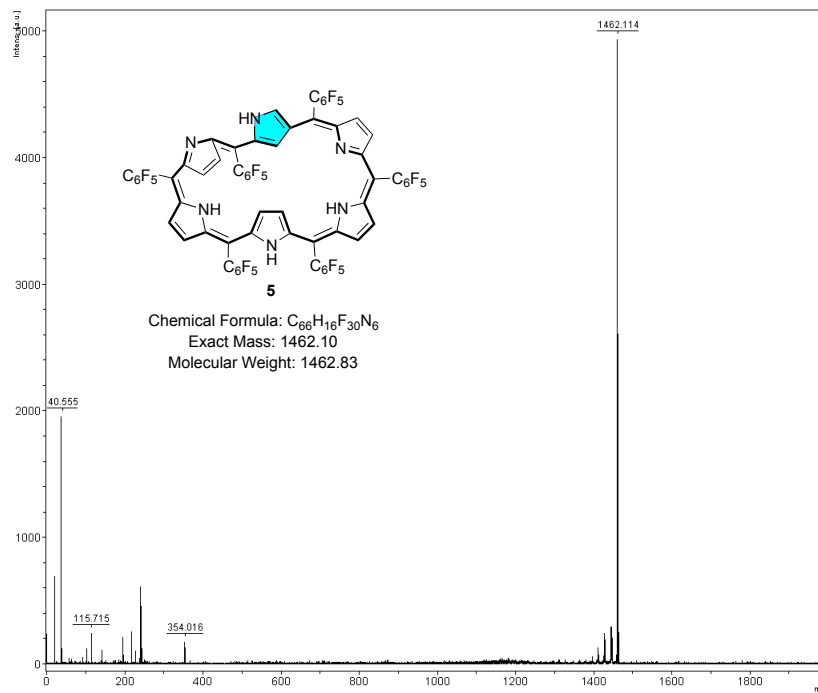

**Fig. S3** MALDI-TOF-MS spectra of (a) **4** and (b) **5**.

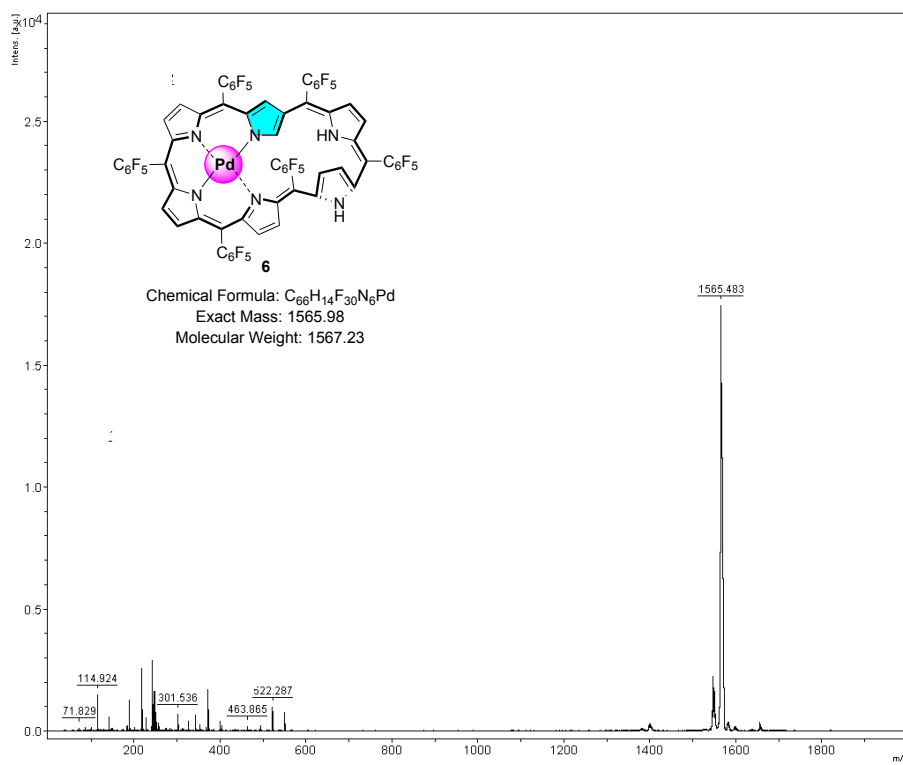

**Fig. S4** MALDI-TOF-MS spectrum of **6**.

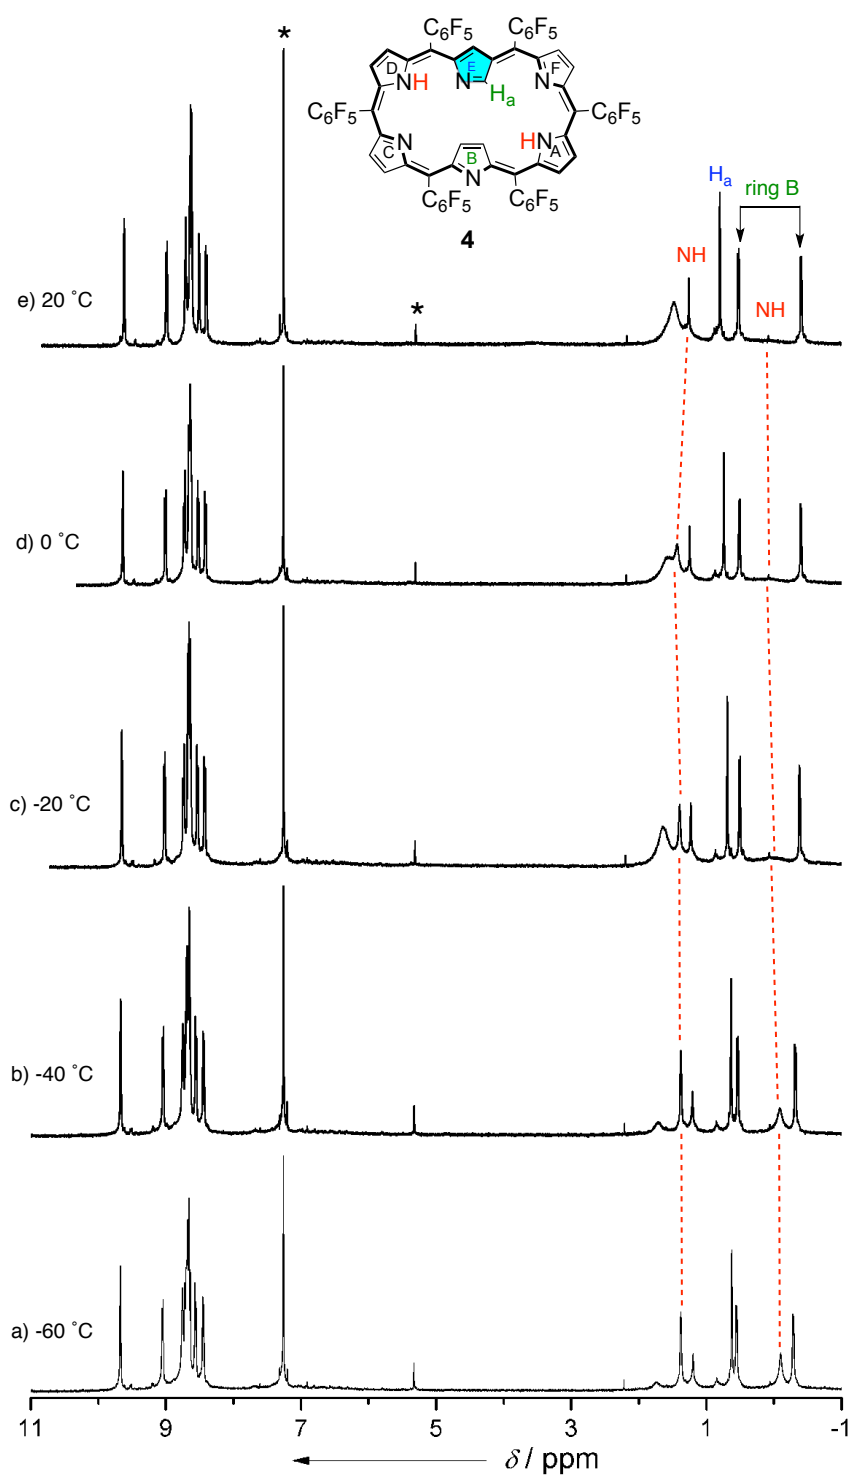

**Fig. S5** Variable temperature  $^1\text{H}$  NMR spectra of **4** in  $\text{CDCl}_3$ . (Peaks marked with \* are due to residual solvents.)

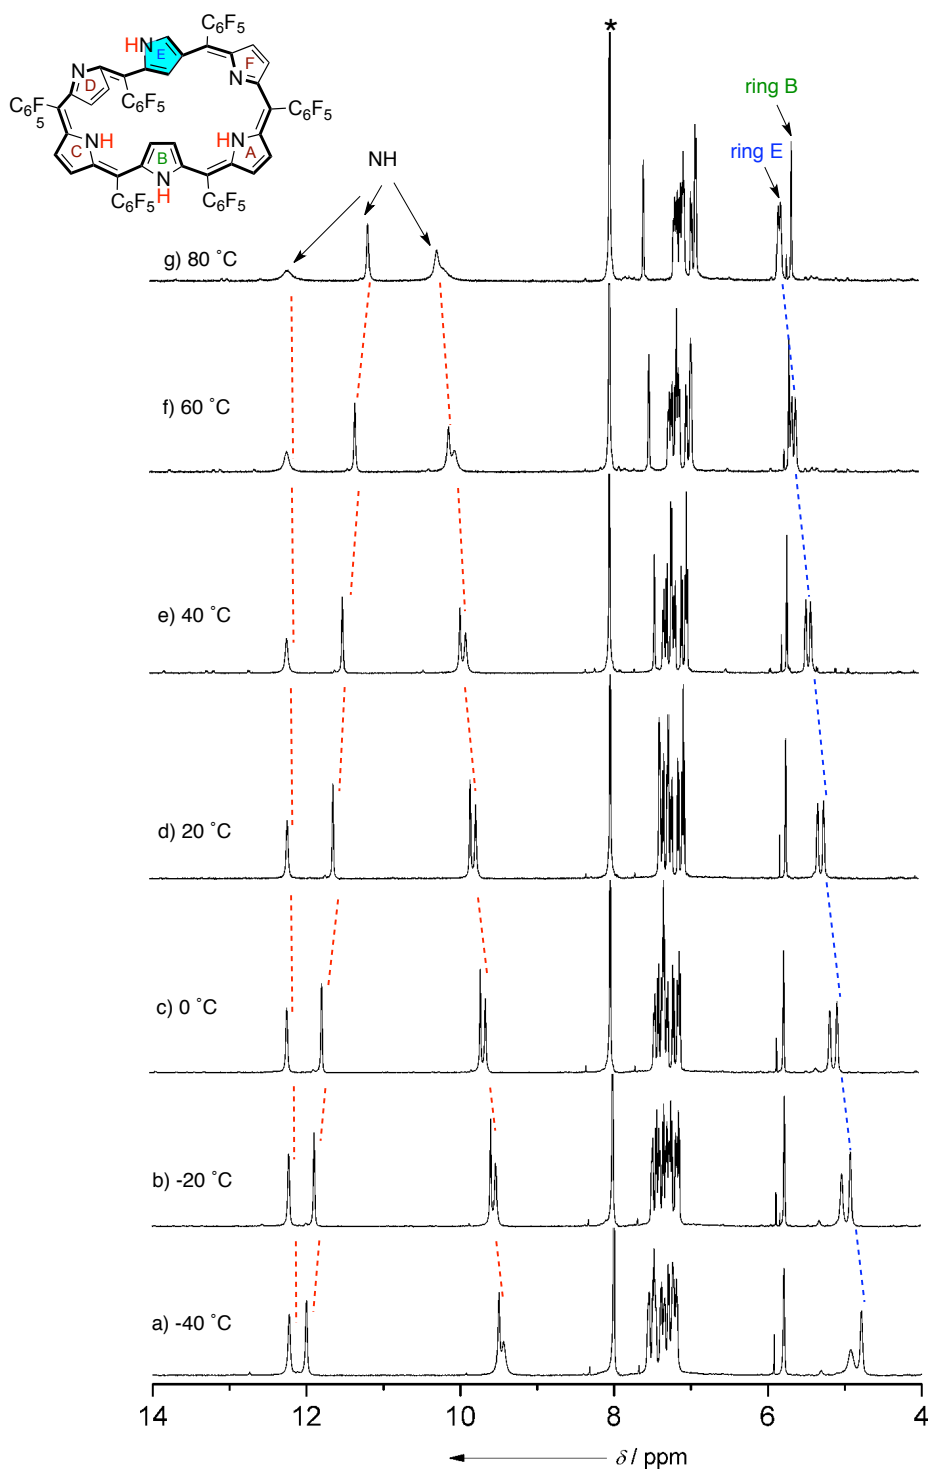

**Fig. S6** Variable temperature  $^1\text{H}$  NMR spectra of **5** in  $\text{DMF-}d_7$ . (Peaks marked with \* is due to residual solvent.)

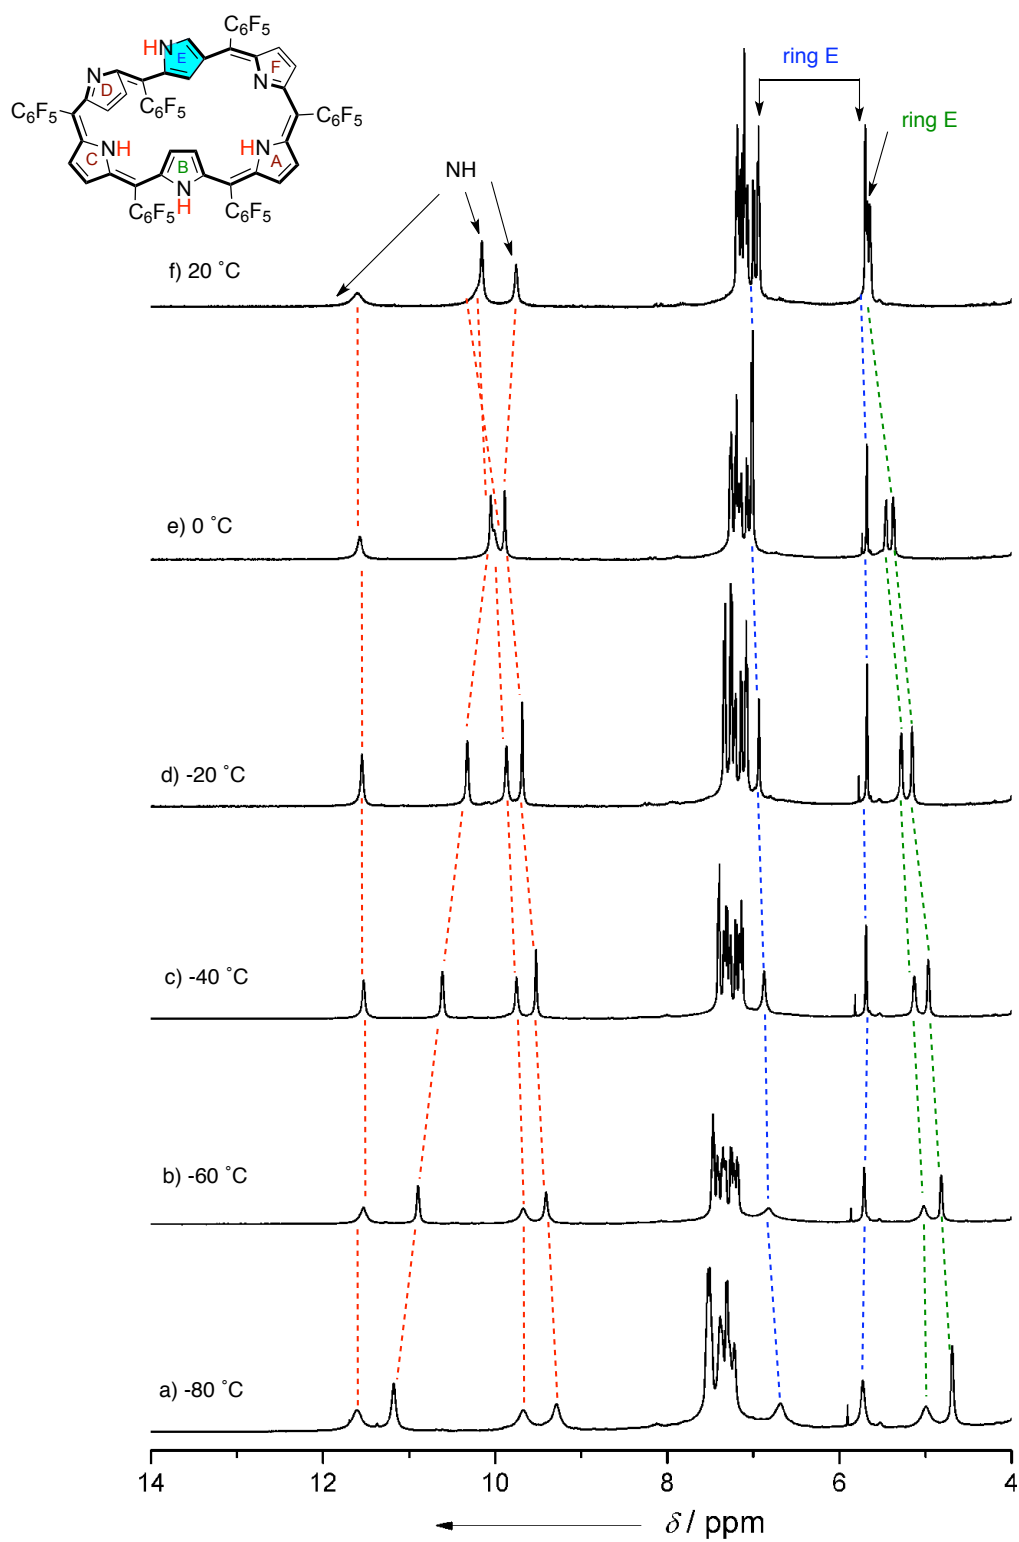

**Fig. S7** Variable temperature  $^1H$  NMR spectra of **5** in  $THF-d_8$ .

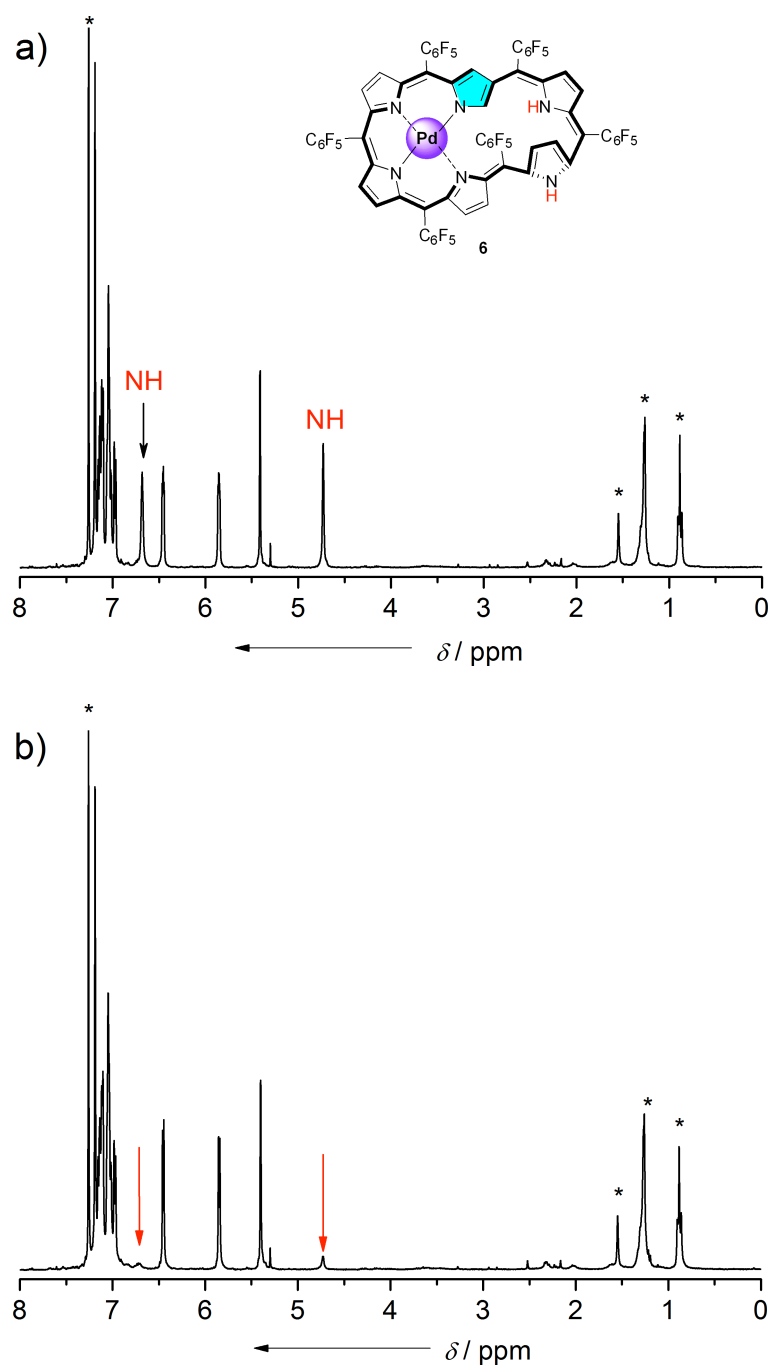

**Fig. S8**  $^1\text{H}$  NMR spectra of **6** in (a)  $\text{CDCl}_3$  and (b)  $\text{CDCl}_3$  with  $\text{D}_2\text{O}$  at 25 °C. (Peaks marked with \* are due to residual solvents.)



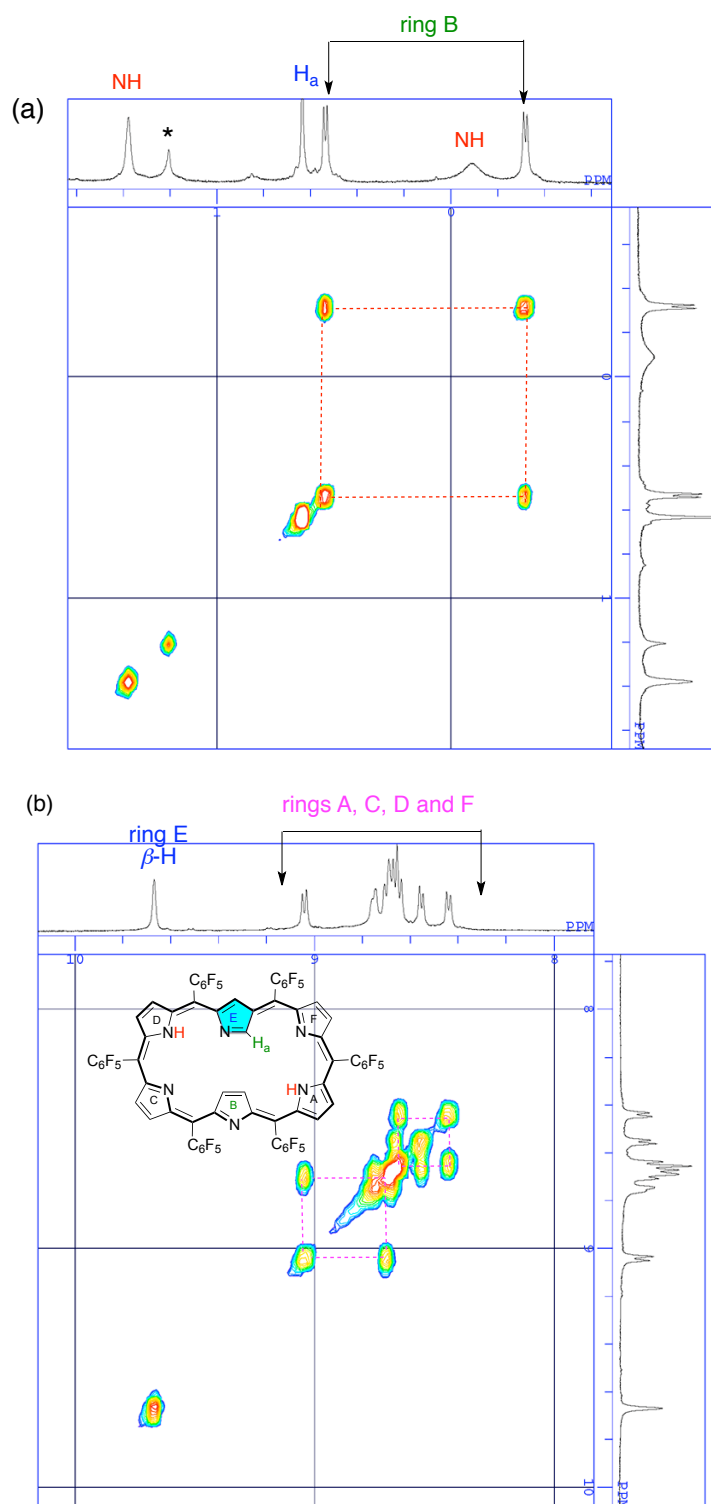

**Fig. S9** <sup>1</sup>H-<sup>1</sup>H COSY spectra of **4** in CDCl<sub>3</sub> at -60 °C: (a) in the upfield region and (b) in the downfield region.

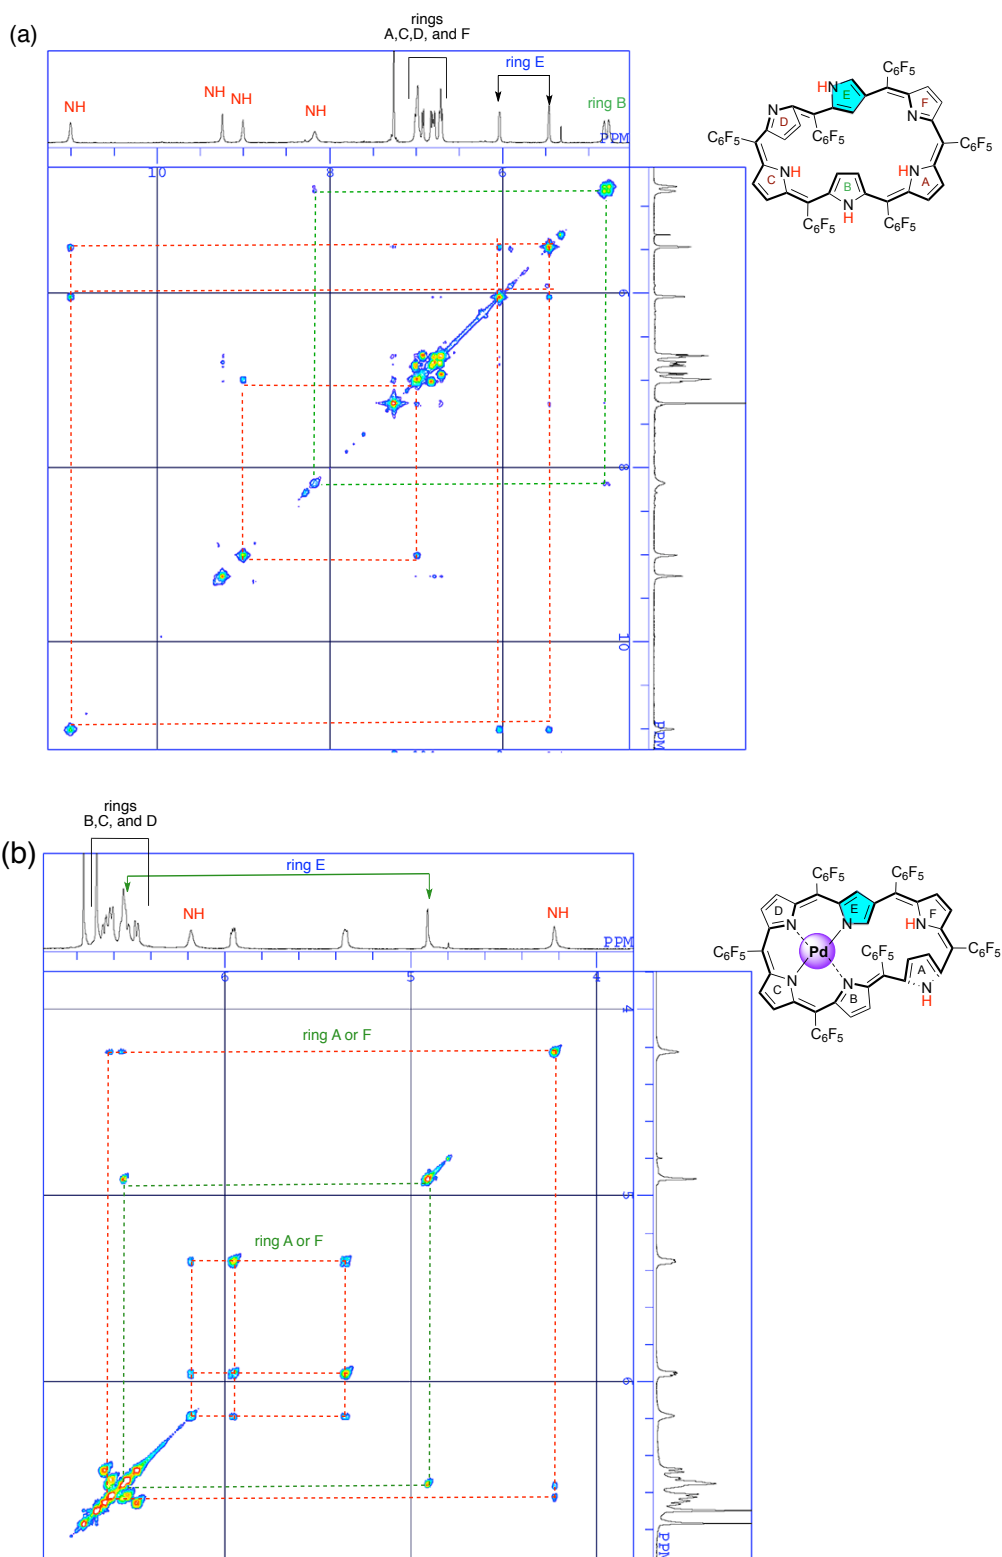

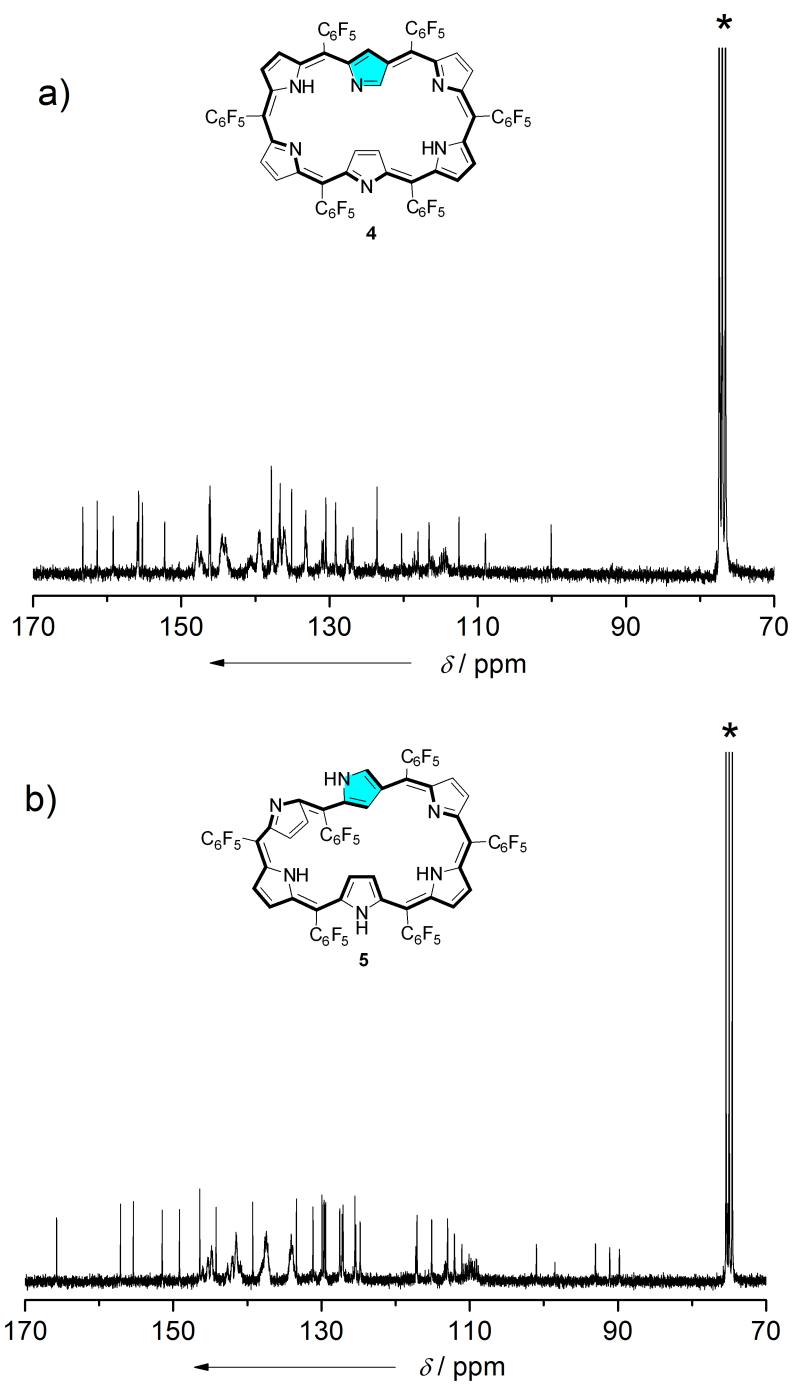

**Fig. S11**  $^{13}\text{C}$  NMR spectra of (a) **4** and (b) **5** in  $\text{CDCl}_3$  at 25 °C.

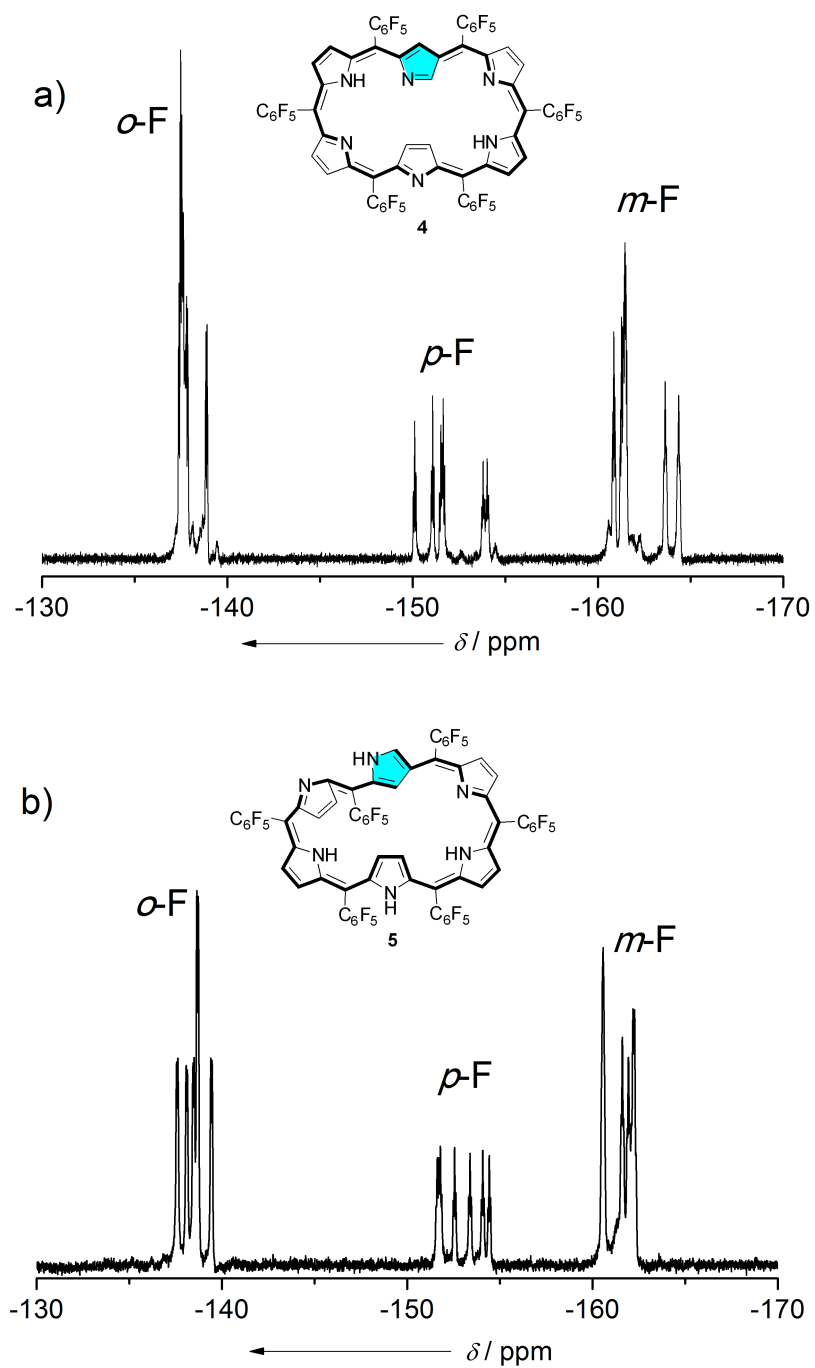

**Fig. S12**  $^{19}\text{F}$  NMR spectra of (a) **4** and (b) **5** in  $\text{CDCl}_3$  at  $25^\circ\text{C}$ .

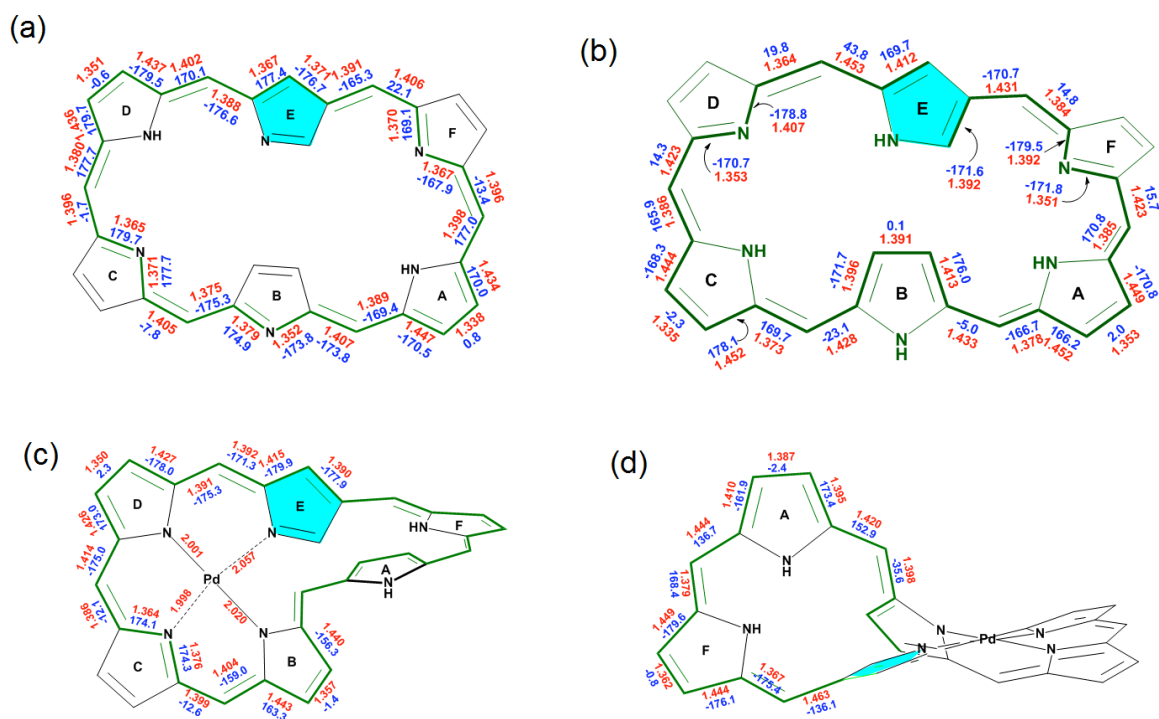

**Fig. S13** Detailed structural data for **4** (a), **5** (b), and **6** (c, d). The annulenic circuits are indicated in green along with the bond lengths (Å) indicated in red and dihedral angles (°) indicated in blue.

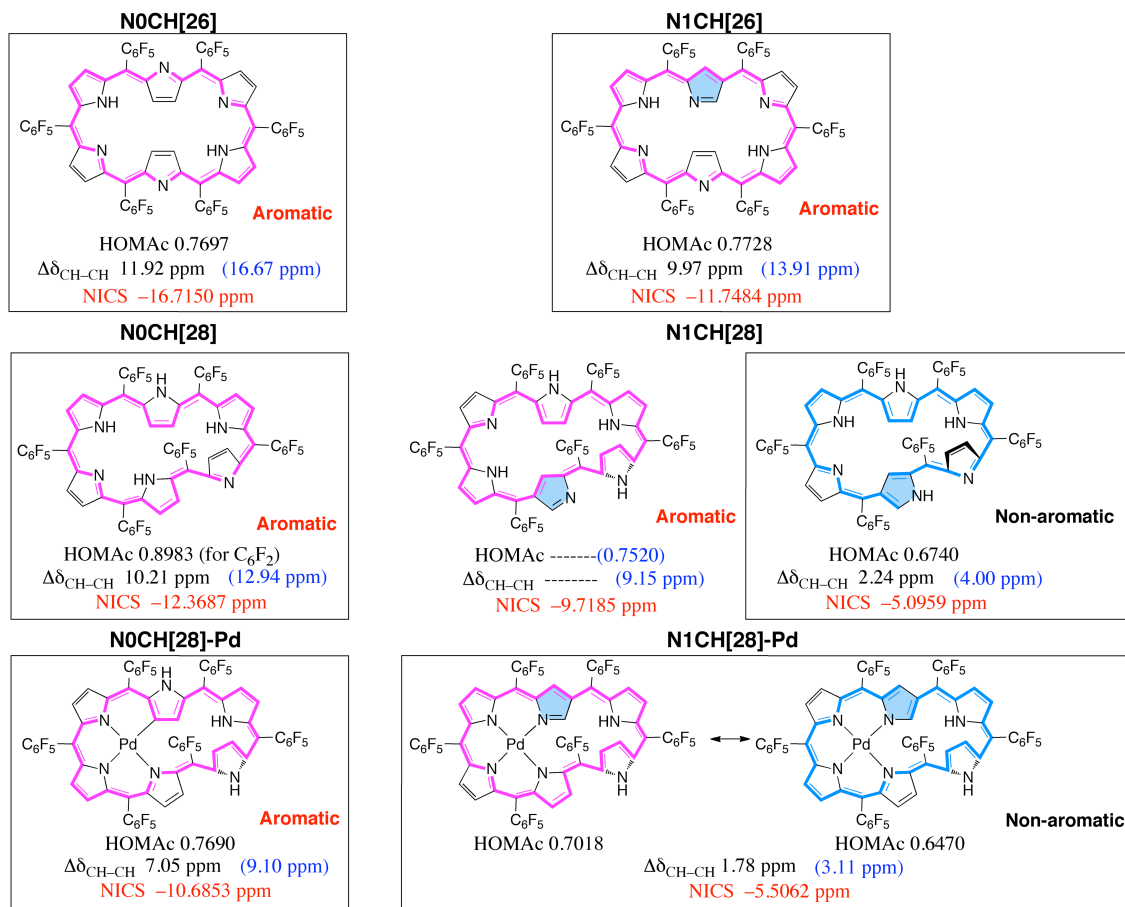

HOMAc based on X-ray structure  
 (HOMAc based on optimized structure)

The subscript "c" means the values are  
 calculated for the annulenic circuit  
 indicated by the colored bold lines.

$\Delta\delta_{\text{CH-CH}}$  in CDCl<sub>3</sub>, experimental  
 ( $\Delta\delta_{\text{CH-CH}}$  for optimized structure,  
 theoretical)

**NICS for optimized structure**

B3LYP/6-31+G\*\*//B3LYP/6-31G\*\*  
 except for a LANL2DZ basis set  
 for Pd

**Fig. S14** Evaluation of aromaticity in regular and singly N-confused [26]- and [28]hexaphyrins and mono-Pd(II) complexes of [28]hexaphyrins.

## Energy, Cartesian coordinate and vibrational frequency for the optimized structures

E(RB3LYP) = -5846.75766715 A.U

Stoichiometry C<sub>66</sub>H<sub>14</sub>F<sub>30</sub>N<sub>6</sub>  
 Framework group C1[X(C<sub>66</sub>H<sub>14</sub>F<sub>30</sub>N<sub>6</sub>)]  
 Deg. of freedom 342  
 Full point group C1  
 Largest Abelian subgroup C1 NOp 1  
 Largest concise Abelian subgroup C1 NOp 1  
 Standard orientation:

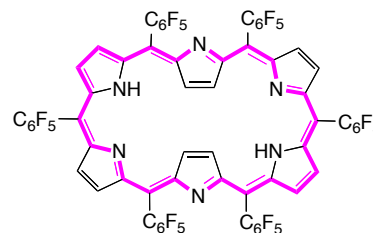

| Center Number | Atomic Number | Atomic Type | Coordinates (Angstroms) |           |           |
|---------------|---------------|-------------|-------------------------|-----------|-----------|
|               |               |             | X                       | Y         | Z         |
| 1             | 6             | 0           | 5.239627                | 1.194520  | 0.154525  |
| 2             | 6             | 0           | 5.881598                | 2.455368  | 0.367370  |
| 3             | 6             | 0           | 4.907524                | 3.406389  | 0.491347  |
| 4             | 6             | 0           | 3.628425                | 2.767384  | 0.373611  |
| 5             | 6             | 0           | 2.387841                | 3.426110  | 0.404616  |
| 6             | 6             | 0           | 1.102760                | 2.844081  | 0.483214  |
| 7             | 6             | 0           | 0.684055                | 1.494428  | 0.882873  |
| 8             | 6             | 0           | -1.066491               | 2.850481  | 0.434432  |
| 9             | 6             | 0           | -2.346901               | 3.423696  | 0.285125  |
| 10            | 6             | 0           | -3.593362               | 2.755395  | 0.318374  |
| 11            | 6             | 0           | -4.857048               | 3.478863  | 0.471877  |
| 12            | 6             | 0           | -5.837198               | 2.549727  | 0.444869  |
| 13            | 6             | 0           | -5.168652               | 1.267590  | 0.242370  |
| 14            | 6             | 0           | -5.852692               | 0.048354  | 0.067504  |
| 15            | 6             | 0           | -5.239643               | -1.194537 | -0.154725 |
| 16            | 6             | 0           | -5.881629               | -2.455415 | -0.367494 |
| 17            | 6             | 0           | -4.907556               | -3.406467 | -0.491319 |
| 18            | 6             | 0           | -3.628411               | -2.767402 | -0.373628 |
| 19            | 6             | 0           | -2.387858               | -3.426157 | -0.404572 |
| 20            | 6             | 0           | -1.102776               | -2.844144 | -0.483216 |
| 21            | 6             | 0           | -0.684056               | -1.494536 | -0.883027 |
| 22            | 6             | 0           | 1.066475                | -2.850529 | -0.434449 |
| 23            | 6             | 0           | 2.346914                | -3.423728 | -0.285142 |
| 24            | 6             | 0           | 3.593361                | -2.755397 | -0.318528 |
| 25            | 6             | 0           | 4.857000                | -3.478865 | -0.472138 |
| 26            | 6             | 0           | 5.837166                | -2.549698 | -0.445237 |
| 27            | 6             | 0           | 5.168636                | -1.267593 | -0.242677 |
| 28            | 6             | 0           | 5.852660                | -0.048371 | -0.067811 |
| 29            | 6             | 0           | -0.674268               | 1.504472  | 0.862197  |
| 30            | 6             | 0           | 0.674266                | -1.504565 | -0.862336 |
| 31            | 6             | 0           | 2.422712                | 4.917045  | 0.335952  |
| 32            | 1             | 0           | -1.320742               | -0.681745 | -1.205308 |
| 33            | 1             | 0           | 1.320741                | 0.681590  | 1.205093  |
| 34            | 1             | 0           | 6.900367                | -2.704364 | -0.554841 |
| 35            | 6             | 0           | -2.375263               | 4.897283  | 0.043975  |
| 36            | 6             | 0           | -7.346695               | 0.059924  | 0.103713  |
| 37            | 6             | 0           | -2.422758               | -4.917078 | -0.335786 |
| 38            | 6             | 0           | 2.375307                | -4.897254 | -0.043809 |
| 39            | 6             | 0           | 7.346679                | -0.059926 | -0.104112 |
| 40            | 1             | 0           | 6.949057                | 2.602246  | 0.426635  |
| 41            | 1             | 0           | 5.045131                | 4.460832  | 0.673720  |
| 42            | 1             | 0           | -4.958699               | 4.544171  | 0.616332  |
| 43            | 1             | 0           | -6.900400               | 2.704363  | 0.554397  |
| 44            | 1             | 0           | -6.949073               | -2.602308 | -0.426774 |
| 45            | 1             | 0           | -5.045132               | -4.460895 | -0.673615 |
| 46            | 1             | 0           | 4.958667                | -4.544188 | -0.616609 |
| 47            | 1             | 0           | 1.350416                | -0.713399 | -1.146668 |
| 48            | 1             | 0           | -1.350417               | 0.713274  | 1.146453  |
| 49            | 1             | 0           | -3.232927               | -0.655632 | -0.034699 |
| 50            | 1             | 0           | 3.232896                | 0.655599  | 0.034576  |
| 51            | 7             | 0           | 0.027017                | 3.622100  | 0.231109  |
| 52            | 7             | 0           | -0.027033               | -3.622163 | -0.231004 |
| 53            | 7             | 0           | 3.883197                | 1.422948  | 0.187377  |
| 54            | 7             | 0           | -3.812344               | 1.415323  | 0.198073  |
| 55            | 7             | 0           | -3.883228               | -1.422980 | -0.187516 |
| 56            | 7             | 0           | 3.812313                | -1.415355 | -0.198243 |
| 57            | 6             | 0           | 2.904250                | 5.594001  | -0.788667 |
| 58            | 6             | 0           | 2.903949                | 6.984183  | -0.868928 |
| 59            | 6             | 0           | 2.410268                | 7.733132  | 0.196120  |
| 60            | 6             | 0           | 1.924228                | 7.088877  | 1.332641  |
| 61            | 6             | 0           | 1.935363                | 5.698893  | 1.390670  |
| 62            | 9             | 0           | 3.376004                | 4.904547  | -1.837907 |

|     |   |   |            |           |           |
|-----|---|---|------------|-----------|-----------|
| 63  | 9 | 0 | 3.369327   | 7.600652  | -1.961335 |
| 64  | 9 | 0 | 2.410790   | 9.066094  | 0.132156  |
| 65  | 9 | 0 | 1.465779   | 7.807826  | 2.361098  |
| 66  | 9 | 0 | 1.479719   | 5.113582  | 2.502364  |
| 67  | 6 | 0 | -2.915788  | 5.423651  | -1.135606 |
| 68  | 6 | 0 | -2.908415  | 6.788321  | -1.411744 |
| 69  | 6 | 0 | -2.340542  | 7.669881  | -0.496446 |
| 70  | 6 | 0 | -1.795652  | 7.179188  | 0.687957  |
| 71  | 6 | 0 | -1.820862  | 5.812855  | 0.947067  |
| 72  | 9 | 0 | -3.449559  | 4.606652  | -2.055009 |
| 73  | 9 | 0 | -3.431272  | 7.252618  | -2.552537 |
| 74  | 9 | 0 | -2.322029  | 8.980290  | -0.749879 |
| 75  | 9 | 0 | -1.241344  | 8.023592  | 1.566939  |
| 76  | 9 | 0 | -1.302081  | 5.393359  | 2.105865  |
| 77  | 6 | 0 | -1.935440  | -5.699031 | -1.390458 |
| 78  | 6 | 0 | -1.924366  | -7.089016 | -1.332307 |
| 79  | 6 | 0 | -2.410376  | -7.733164 | -0.195710 |
| 80  | 6 | 0 | -2.904011  | -6.984109 | 0.869277  |
| 81  | 6 | 0 | -2.904297  | -5.593942 | 0.788924  |
| 82  | 9 | 0 | -1.479811  | -5.113843 | -2.502213 |
| 83  | 9 | 0 | -1.465948  | -7.808056 | -2.360703 |
| 84  | 9 | 0 | -2.410943  | -9.066126 | -0.131638 |
| 85  | 9 | 0 | -3.369420  | -7.600501 | 1.961745  |
| 86  | 9 | 0 | -3.376051  | -4.904380 | 1.838103  |
| 87  | 6 | 0 | 1.820876   | -5.812994 | -0.946717 |
| 88  | 6 | 0 | 1.795712   | -7.179281 | -0.687455 |
| 89  | 6 | 0 | 2.340738   | -7.669822 | 0.496947  |
| 90  | 6 | 0 | 2.908673   | -6.788124 | 1.412078  |
| 91  | 6 | 0 | 2.916016   | -5.423471 | 1.135772  |
| 92  | 9 | 0 | 1.301926   | -5.393636 | -2.105546 |
| 93  | 9 | 0 | 1.241343   | -8.023807 | -1.566300 |
| 94  | 9 | 0 | 2.322303   | -8.980155 | 0.750548  |
| 95  | 9 | 0 | 3.431667   | -7.252253 | 2.552886  |
| 96  | 9 | 0 | 3.449816   | -4.606333 | 2.055022  |
| 97  | 6 | 0 | 8.098677   | -0.635535 | 0.926238  |
| 98  | 6 | 0 | 9.491026   | -0.655314 | 0.901244  |
| 99  | 6 | 0 | 10.167266  | -0.082486 | -0.173783 |
| 100 | 6 | 0 | 9.448396   | 0.502202  | -1.214036 |
| 101 | 6 | 0 | 8.056352   | 0.505929  | -1.169221 |
| 102 | 9 | 0 | 7.479626   | -1.189536 | 1.976028  |
| 103 | 9 | 0 | 10.179561  | -1.211133 | 1.902618  |
| 104 | 9 | 0 | 11.500579  | -0.093048 | -0.206468 |
| 105 | 9 | 0 | 10.095324  | 1.049183  | -2.247666 |
| 106 | 9 | 0 | 7.394732   | 1.074291  | -2.185914 |
| 107 | 6 | 0 | -8.098617  | 0.635503  | -0.926698 |
| 108 | 6 | 0 | -9.490981  | 0.655312  | -0.901780 |
| 109 | 6 | 0 | -10.167282 | 0.082560  | 0.173202  |
| 110 | 6 | 0 | -9.448488  | -0.502098 | 1.213546  |
| 111 | 6 | 0 | -8.056444  | -0.505854 | 1.168792  |
| 112 | 9 | 0 | -7.479505  | 1.189456  | -1.976472 |
| 113 | 9 | 0 | -10.179440 | 1.211100  | -1.903260 |
| 114 | 9 | 0 | -11.500595 | 0.093138  | 0.205810  |
| 115 | 9 | 0 | -10.095508 | -1.049032 | 2.247146  |
| 116 | 9 | 0 | -7.394900  | -1.074185 | 2.185561  |

Rotational constants (GHZ): 0.0138674 0.0120372 0.0068866

Harmonic frequencies (cm<sup>-1</sup>), IR intensities (KM/Mole), Raman scattering activities (A<sup>4</sup>/AMU), depolarization ratios for plane and unpolarized incident light, reduced masses (AMU), force constants (mDyne/A), and normal coordinates:

|                | 1<br>A  | 2<br>A  | 3<br>A  |
|----------------|---------|---------|---------|
| Frequencies -- | 3.9526  | 5.5417  | 8.0910  |
| Red. masses -- | 15.0053 | 14.8872 | 15.8285 |
| Frc consts --  | 0.0001  | 0.0003  | 0.0006  |
| IR Inten --    | 0.0992  | 0.0278  | 0.0005  |



E(RB3LYP) = -5848.01558711 A.U.

Stoichiometry C66H16F30N6  
 Framework group C1[X(C66H16F30N6)]  
 Deg. of freedom 348  
 Full point group C1 NOp 1  
 Largest Abelian subgroup C1 NOp 1  
 Largest concise Abelian subgroup C1 NOp 1

Standard orientation:

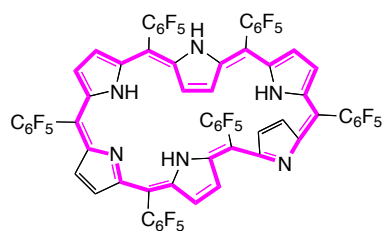

| Center Number | Atomic Number | Atomic Type | Coordinates (Angstroms) |           |           |
|---------------|---------------|-------------|-------------------------|-----------|-----------|
|               |               |             | X                       | Y         | Z         |
| 1             | 6             | 0           | 5.314943                | -0.816810 | 0.315229  |
| 2             | 6             | 0           | 6.319267                | -0.051595 | 0.994466  |
| 3             | 6             | 0           | 5.723740                | 1.080983  | 1.495113  |
| 4             | 6             | 0           | 4.331573                | 1.055667  | 1.139933  |
| 5             | 6             | 0           | 3.342943                | 2.045163  | 1.303300  |
| 6             | 6             | 0           | 1.987270                | 1.819264  | 0.955555  |
| 7             | 6             | 0           | 1.240599                | 0.613377  | 0.854339  |
| 8             | 6             | 0           | -0.017803               | 0.914329  | 0.374323  |
| 9             | 6             | 0           | -0.095190               | 2.320011  | 0.152752  |
| 10            | 6             | 0           | -1.090575               | 3.114811  | -0.456174 |
| 11            | 6             | 0           | -2.371005               | 2.665312  | -0.833150 |
| 12            | 6             | 0           | -3.298070               | 3.336496  | -1.697153 |
| 13            | 6             | 0           | -4.423487               | 2.560760  | -1.818383 |
| 14            | 6             | 0           | -4.246430               | 1.394688  | -1.009991 |
| 15            | 6             | 0           | -5.161839               | 0.382142  | -0.680692 |
| 16            | 6             | 0           | -4.852774               | -0.677851 | 0.208794  |
| 17            | 6             | 0           | -5.832777               | -1.423165 | 0.980941  |
| 18            | 6             | 0           | -5.129783               | -2.142642 | 1.899042  |
| 19            | 6             | 0           | -3.726947               | -1.898907 | 1.621769  |
| 20            | 6             | 0           | -2.637731               | -2.520195 | 2.274156  |
| 21            | 6             | 0           | -1.365552               | -2.650601 | 1.683667  |
| 22            | 6             | 0           | -0.123726               | -3.041078 | 2.268902  |
| 23            | 6             | 0           | 0.825592                | -3.090214 | 1.276063  |
| 24            | 6             | 0           | 0.192034                | -2.773172 | 0.031121  |
| 25            | 6             | 0           | 0.723384                | -2.906529 | -1.273024 |
| 26            | 6             | 0           | 2.124919                | -2.888125 | -1.480544 |
| 27            | 6             | 0           | 2.864247                | -3.604647 | -2.509067 |
| 28            | 6             | 0           | 4.184890                | -3.451292 | -2.207189 |
| 29            | 6             | 0           | 4.240213                | -2.566260 | -1.052054 |
| 30            | 6             | 0           | 5.398928                | -1.973569 | -0.483176 |
| 31            | 6             | 0           | 3.748454                | 3.405296  | 1.740534  |
| 32            | 6             | 0           | 3.150660                | 4.012977  | 2.857743  |
| 33            | 6             | 0           | 3.510301                | 5.284175  | 3.295413  |
| 34            | 6             | 0           | 4.498966                | 5.992476  | 2.615343  |
| 35            | 6             | 0           | 5.112018                | 5.425490  | 1.500739  |
| 36            | 6             | 0           | 4.729818                | 4.156208  | 1.072798  |
| 37            | 6             | 0           | -0.764547               | 4.537015  | -0.767723 |
| 38            | 6             | 0           | -1.453887               | 5.597036  | -0.160957 |
| 39            | 6             | 0           | -1.171921               | 6.928883  | -0.455945 |
| 40            | 6             | 0           | -0.170636               | 7.234155  | -1.375290 |
| 41            | 6             | 0           | 0.538241                | 6.207059  | -1.994741 |
| 42            | 6             | 0           | 0.233995                | 4.882354  | -1.690273 |
| 43            | 6             | 0           | -6.550345               | 0.482749  | -1.205559 |
| 44            | 6             | 0           | -7.085105               | -0.529973 | -2.014260 |
| 45            | 6             | 0           | -8.384318               | -0.475720 | -2.511428 |
| 46            | 6             | 0           | -9.193155               | 0.615652  | -2.203952 |
| 47            | 6             | 0           | -8.696284               | 1.639724  | -1.401516 |
| 48            | 6             | 0           | -7.395731               | 1.560679  | -0.909764 |
| 49            | 6             | 0           | -2.846560               | -3.089488 | 3.629026  |
| 50            | 6             | 0           | -3.336402               | -2.300734 | 4.681885  |
| 51            | 6             | 0           | -3.548612               | -2.814251 | 5.958229  |
| 52            | 6             | 0           | -3.269120               | -4.153760 | 6.217491  |
| 53            | 6             | 0           | -2.781737               | -4.967589 | 5.197607  |
| 54            | 6             | 0           | -2.582249               | -4.435385 | 3.926820  |
| 55            | 6             | 0           | 6.733719                | -2.541639 | -0.797439 |
| 56            | 6             | 0           | 7.038801                | -3.878375 | -0.499741 |
| 57            | 6             | 0           | 8.278155                | -4.440956 | -0.791787 |
| 58            | 6             | 0           | 9.261581                | -3.663866 | -1.399061 |
| 59            | 6             | 0           | 8.994498                | -2.333243 | -1.710892 |
| 60            | 6             | 0           | 7.745496                | -1.792981 | -1.416076 |
| 61            | 6             | 0           | -0.180026               | -3.138735 | -2.423279 |
| 62            | 6             | 0           | -0.066151               | -2.389548 | -3.607085 |
| 63            | 6             | 0           | -0.894054               | -2.605116 | -4.704951 |
| 64            | 6             | 0           | -1.875764               | -3.591265 | -4.646977 |
| 65            | 6             | 0           | -2.020633               | -4.354579 | -3.490616 |
| 66            | 6             | 0           | -1.179049               | -4.127936 | -2.405995 |
| 67            | 9             | 0           | 2.207530                | 3.359675  | 3.548216  |
| 68            | 9             | 0           | 5.324705                | 3.668348  | -0.022666 |
| 69            | 9             | 0           | -2.414997               | 5.345946  | 0.734526  |

|     |   |   |            |           |           |
|-----|---|---|------------|-----------|-----------|
| 70  | 9 | 0 | 0.927868   | 3.920760  | -2.314667 |
| 71  | 9 | 0 | -6.334706  | -1.589419 | -2.344443 |
| 72  | 9 | 0 | -6.968601  | 2.556201  | -0.120482 |
| 73  | 9 | 0 | -3.597002  | -1.002253 | 4.485756  |
| 74  | 9 | 0 | -2.139575  | -5.263323 | 2.971330  |
| 75  | 9 | 0 | 6.128641   | -4.656875 | 0.100325  |
| 76  | 9 | 0 | 7.526416   | -0.516536 | -1.761477 |
| 77  | 9 | 0 | -1.334643  | -4.906928 | -1.327517 |
| 78  | 9 | 0 | 0.843094   | -1.411782 | -3.702201 |
| 79  | 1 | 0 | 7.359483   | -0.328577 | 1.081421  |
| 80  | 1 | 0 | 6.202604   | 1.868801  | 2.057705  |
| 81  | 1 | 0 | 1.584238   | -0.368011 | 1.141951  |
| 82  | 1 | 0 | -0.793536  | 0.194051  | 0.173908  |
| 83  | 1 | 0 | -3.106877  | 4.280092  | -2.185853 |
| 84  | 1 | 0 | -5.298846  | 2.776357  | -2.412305 |
| 85  | 1 | 0 | -6.906788  | -1.358634 | 0.876299  |
| 86  | 1 | 0 | -5.519817  | -2.810338 | 2.654693  |
| 87  | 1 | 0 | 3.285185   | -0.513516 | 0.062899  |
| 88  | 1 | 0 | 0.020609   | -3.259457 | 3.316729  |
| 89  | 1 | 0 | 1.863268   | -3.368665 | 1.364917  |
| 90  | 1 | 0 | 2.434097   | -4.199333 | -3.303560 |
| 91  | 1 | 0 | 5.032768   | -3.861351 | -2.738712 |
| 92  | 1 | 0 | 1.403029   | 3.788546  | 0.456157  |
| 93  | 1 | 0 | -2.678397  | 0.782629  | 0.203624  |
| 94  | 1 | 0 | -1.839385  | -2.145325 | -0.292406 |
| 95  | 7 | 0 | 4.138185   | -0.124863 | 0.469833  |
| 96  | 7 | 0 | 1.123597   | 2.827344  | 0.571005  |
| 97  | 7 | 0 | -2.980980  | 1.487265  | -0.464973 |
| 98  | 7 | 0 | -3.585380  | -1.008976 | 0.591501  |
| 99  | 7 | 0 | -1.121197  | -2.486310 | 0.335637  |
| 100 | 7 | 0 | 2.981948   | -2.255884 | -0.635012 |
| 101 | 9 | 0 | 1.494346   | 6.497103  | -2.882471 |
| 102 | 9 | 0 | 0.110115   | 8.506120  | -1.660741 |
| 103 | 9 | 0 | -1.847041  | 7.913646  | 0.143913  |
| 104 | 9 | 0 | 8.533701   | -5.716891 | -0.482212 |
| 105 | 9 | 0 | 10.454728  | -4.192067 | -1.680587 |
| 106 | 9 | 0 | 9.931394   | -1.586905 | -2.306706 |
| 107 | 9 | 0 | -2.525037  | -6.257726 | 5.439890  |
| 108 | 9 | 0 | -3.467105  | -4.655713 | 7.438099  |
| 109 | 9 | 0 | -4.006136  | -2.027080 | 6.938058  |
| 110 | 9 | 0 | -8.855947  | -1.457668 | -3.287304 |
| 111 | 9 | 0 | -10.439675 | 0.679909  | -2.676794 |
| 112 | 9 | 0 | -9.474851  | 2.683226  | -1.094098 |
| 113 | 9 | 0 | -2.950672  | -5.313411 | -3.437833 |
| 114 | 9 | 0 | -2.673965  | -3.804273 | -5.694254 |
| 115 | 9 | 0 | -0.760934  | -1.862374 | -5.809170 |
| 116 | 9 | 0 | 2.923803   | 5.822775  | 4.369132  |
| 117 | 9 | 0 | 4.853540   | 7.210103  | 3.028125  |
| 118 | 9 | 0 | 6.047622   | 6.110067  | 0.835301  |

-----  
 Harmonic frequencies (cm<sup>-1</sup>), IR intensities (KM/Mole), Raman scattering activities (A<sup>4</sup>/AMU), depolarization ratios for plane and unpolarized incident light, reduced masses (AMU), force constants (mDyne/A), and normal coordinates:

|                | 1       | 2       | 3       |
|----------------|---------|---------|---------|
|                | A       | A       | A       |
| Frequencies -- | 7.6238  | 8.0588  | 10.6944 |
| Red. masses -- | 15.1220 | 15.3773 | 15.0599 |
| Frc consts --  | 0.0005  | 0.0006  | 0.0010  |
| IR Inten --    | 0.0012  | 0.0040  | 0.0036  |

E(RB3LYP) = -5973.52314852 A.U.

Stoichiometry C66H14F30N6Pd  
 Framework group C1[X(C66H14F30N6Pd)]  
 Deg. of freedom 345  
 Full point group C1 NOp 1  
 Largest Abelian subgroup C1 NOp 1  
 Largest concise Abelian subgroup C1 NOp 1

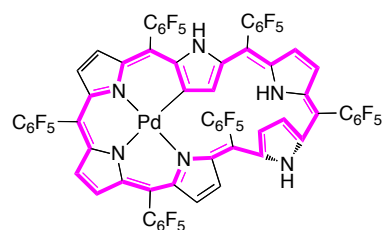

Standard orientation:

| Center Number | Atomic Number | Atomic Type | Coordinates (Angstroms) |           |           |
|---------------|---------------|-------------|-------------------------|-----------|-----------|
|               |               |             | X                       | Y         | Z         |
| 1             | 6             | 0           | 0.368543                | -2.600459 | -0.710244 |
| 2             | 6             | 0           | 0.820605                | -3.867959 | -0.165088 |
| 3             | 6             | 0           | -0.150283               | -4.302585 | 0.686606  |
| 4             | 6             | 0           | -1.193747               | -3.298924 | 0.697137  |
| 5             | 6             | 0           | -2.480809               | -3.466133 | 1.254939  |
| 6             | 6             | 0           | -3.573754               | -2.628341 | 0.971076  |
| 7             | 6             | 0           | -4.961164               | -2.877981 | 1.318964  |
| 8             | 6             | 0           | -5.689288               | -1.843870 | 0.820441  |
| 9             | 6             | 0           | -4.750443               | -0.918260 | 0.211275  |
| 10            | 6             | 0           | -5.056197               | 0.356439  | -0.291789 |
| 11            | 6             | 0           | -4.112718               | 1.378986  | -0.540212 |
| 12            | 6             | 0           | -4.435442               | 2.685068  | -1.068761 |
| 13            | 6             | 0           | -3.293546               | 3.427294  | -1.044328 |
| 14            | 6             | 0           | -2.255169               | 2.586680  | -0.503563 |
| 15            | 6             | 0           | -0.938188               | 2.982587  | -0.212281 |
| 16            | 6             | 0           | 0.022451                | 2.086198  | 0.275076  |
| 17            | 6             | 0           | -0.023202               | 0.653667  | 0.317752  |
| 18            | 6             | 0           | 1.206140                | 0.262642  | 0.864762  |
| 19            | 6             | 0           | 1.984307                | 1.409203  | 1.182800  |
| 20            | 6             | 0           | 3.272608                | 1.541277  | 1.807085  |
| 21            | 6             | 0           | 4.291307                | 0.625000  | 1.537503  |
| 22            | 6             | 0           | 5.576329                | 0.395566  | 2.138785  |
| 23            | 6             | 0           | 6.232685                | -0.568529 | 1.414002  |
| 24            | 6             | 0           | 5.392730                | -0.978320 | 0.321463  |
| 25            | 6             | 0           | 5.610098                | -1.837067 | -0.762451 |
| 26            | 6             | 0           | 4.503828                | -2.154013 | -1.628412 |
| 27            | 6             | 0           | 4.388613                | -2.138523 | -3.039446 |
| 28            | 6             | 0           | 3.033293                | -2.076182 | -3.362024 |
| 29            | 6             | 0           | 2.288082                | -2.126166 | -2.161369 |
| 30            | 6             | 0           | 0.902896                | -1.990392 | -1.860526 |
| 31            | 6             | 0           | -2.704196               | -4.668364 | 2.109267  |
| 32            | 6             | 0           | -2.129783               | -4.758086 | 3.382922  |
| 33            | 6             | 0           | -2.308320               | -5.872314 | 4.199376  |
| 34            | 6             | 0           | -3.082258               | -6.938463 | 3.746742  |
| 35            | 6             | 0           | -3.666387               | -6.882885 | 2.483296  |
| 36            | 6             | 0           | -3.467781               | -5.760778 | 1.681871  |
| 37            | 6             | 0           | -6.498205               | 0.669435  | -0.511217 |
| 38            | 6             | 0           | -7.241262               | -0.004583 | -1.488975 |
| 39            | 6             | 0           | -8.591996               | 0.259465  | -1.704393 |
| 40            | 6             | 0           | -9.236189               | 1.221223  | -0.929724 |
| 41            | 6             | 0           | -8.527294               | 1.908883  | 0.052948  |
| 42            | 6             | 0           | -7.178477               | 1.625603  | 0.253412  |
| 43            | 6             | 0           | -0.557914               | 4.410678  | -0.400248 |
| 44            | 6             | 0           | -1.135025               | 5.446116  | 0.346947  |
| 45            | 6             | 0           | -0.779943               | 6.779777  | 0.154816  |
| 46            | 6             | 0           | 0.181176                | 7.106377  | -0.799616 |
| 47            | 6             | 0           | 0.779717                | 6.100411  | -1.555916 |
| 48            | 6             | 0           | 0.407478                | 4.774043  | -1.350790 |
| 49            | 6             | 0           | 3.532689                | 2.705124  | 2.684331  |
| 50            | 6             | 0           | 2.655378                | 3.029804  | 3.735617  |
| 51            | 6             | 0           | 2.872458                | 4.116588  | 4.577061  |
| 52            | 6             | 0           | 3.997413                | 4.918659  | 4.392857  |
| 53            | 6             | 0           | 4.888971                | 4.630217  | 3.362396  |
| 54            | 6             | 0           | 4.648442                | 3.544973  | 2.523552  |
| 55            | 6             | 0           | 6.958753                | -2.314746 | -1.117688 |
| 56            | 6             | 0           | 7.181062                | -3.667567 | -1.432497 |
| 57            | 6             | 0           | 8.432697                | -4.152045 | -1.797767 |
| 58            | 6             | 0           | 9.519787                | -3.282219 | -1.854799 |
| 59            | 6             | 0           | 9.340102                | -1.934707 | -1.551123 |
| 60            | 6             | 0           | 8.077313                | -1.467005 | -1.198313 |
| 61            | 6             | 0           | 0.063257                | -1.174331 | -2.762020 |
| 62            | 6             | 0           | -1.161223               | -1.644336 | -3.261497 |
| 63            | 6             | 0           | -1.983224               | -0.854485 | -4.058269 |
| 64            | 6             | 0           | -1.589547               | 0.441453  | -4.384586 |
| 65            | 6             | 0           | -0.374234               | 0.936396  | -3.916338 |
| 66            | 6             | 0           | 0.434737                | 0.129592  | -3.125208 |
| 67            | 9             | 0           | -1.382948               | -3.749236 | 3.852121  |
| 68            | 9             | 0           | -1.747964               | -5.922386 | 5.412965  |
| 69            | 9             | 0           | -3.262846               | -8.011016 | 4.521057  |

|     |    |   |            |           |           |
|-----|----|---|------------|-----------|-----------|
| 70  | 9  | 0 | -4.402443  | -7.909570 | 2.043465  |
| 71  | 9  | 0 | -4.033965  | -5.750054 | 0.467428  |
| 72  | 9  | 0 | -6.653282  | -0.928674 | -2.258946 |
| 73  | 9  | 0 | -9.270844  | -0.397551 | -2.651139 |
| 74  | 9  | 0 | -10.530178 | 1.483357  | -1.127359 |
| 75  | 9  | 0 | -9.148156  | 2.825774  | 0.803572  |
| 76  | 9  | 0 | -6.535462  | 2.294495  | 1.219377  |
| 77  | 9  | 0 | -2.049974  | 5.170107  | 1.282893  |
| 78  | 9  | 0 | -1.345445  | 7.744558  | 0.886718  |
| 79  | 9  | 0 | 0.530626   | 8.379932  | -0.987244 |
| 80  | 9  | 0 | 1.699280   | 6.414519  | -2.473683 |
| 81  | 9  | 0 | 0.993821   | 3.832011  | -2.100619 |
| 82  | 9  | 0 | 1.574802   | 2.274191  | 3.961861  |
| 83  | 9  | 0 | 2.019494   | 4.385644  | 5.569781  |
| 84  | 9  | 0 | 4.217290   | 5.958917  | 5.197841  |
| 85  | 9  | 0 | 5.960022   | 5.407353  | 3.171288  |
| 86  | 9  | 0 | 5.517787   | 3.333174  | 1.525272  |
| 87  | 9  | 0 | 6.171357   | -4.546245 | -1.363677 |
| 88  | 9  | 0 | 8.601771   | -5.448348 | -2.077871 |
| 89  | 9  | 0 | 10.725523  | -3.737889 | -2.198405 |
| 90  | 9  | 0 | 10.376339  | -1.092402 | -1.621175 |
| 91  | 9  | 0 | 7.952817   | -0.154280 | -0.956428 |
| 92  | 9  | 0 | -1.574965  | -2.882799 | -2.973150 |
| 93  | 9  | 0 | -3.146823  | -1.330193 | -4.512528 |
| 94  | 9  | 0 | -2.375255  | 1.208536  | -5.143056 |
| 95  | 9  | 0 | -0.006602  | 2.189585  | -4.208290 |
| 96  | 9  | 0 | 1.567761   | 0.667470  | -2.646718 |
| 97  | 1  | 0 | 1.686950   | -4.418208 | -0.505243 |
| 98  | 1  | 0 | -0.197931  | -5.256893 | 1.191168  |
| 99  | 1  | 0 | 1.542671   | 3.454043  | 0.877214  |
| 100 | 1  | 0 | 3.532720   | -0.138950 | -0.252859 |
| 101 | 1  | 0 | 2.974546   | -2.252351 | -0.169591 |
| 102 | 1  | 0 | -5.328855  | -3.734809 | 1.863717  |
| 103 | 1  | 0 | -6.757633  | -1.697997 | 0.891287  |
| 104 | 1  | 0 | -5.411887  | 2.996108  | -1.409406 |
| 105 | 1  | 0 | -3.168737  | 4.451358  | -1.365037 |
| 106 | 1  | 0 | 1.494437   | -0.746141 | 1.123035  |
| 107 | 1  | 0 | 5.935715   | 0.888807  | 3.030421  |
| 108 | 1  | 0 | 7.211253   | -0.976834 | 1.621198  |
| 109 | 1  | 0 | 5.221140   | -2.084857 | -3.726638 |
| 110 | 1  | 0 | 2.605289   | -2.006553 | -4.351945 |
| 111 | 7  | 0 | -0.809648  | -2.249178 | -0.089318 |
| 112 | 7  | 0 | -3.494930  | -1.439545 | 0.293546  |
| 113 | 7  | 0 | -2.773414  | 1.344713  | -0.233002 |
| 114 | 7  | 0 | 1.229490   | 2.497644  | 0.819453  |
| 115 | 7  | 0 | 4.214637   | -0.259988 | 0.481621  |
| 116 | 7  | 0 | 3.220067   | -2.220657 | -1.147178 |
| 117 | 46 | 0 | -1.714116  | -0.394289 | 0.022502  |

Harmonic frequencies (cm<sup>-1</sup>), IR intensities (KM/Mole), Raman scattering activities (A<sup>4</sup>/AMU), depolarization ratios for plane and unpolarized incident light, reduced masses (AMU), force constants (mDyne/A), and normal coordinates:

|                | 1       | 2       | 3       |
|----------------|---------|---------|---------|
|                | A       | A       | A       |
| Frequencies -- | 8.0297  | 9.7839  | 12.3547 |
| Red. masses -- | 15.4009 | 15.4632 | 15.6071 |
| Frc consts --  | 0.0006  | 0.0009  | 0.0014  |
| IR Inten --    | 0.0049  | 0.0031  | 0.0119  |

E(RB3LYP) = -5846.75450123 A.U.

Stoichiometry C66H14F30N6  
 Framework group C1[X(C66H14F30N6)]  
 Deg. of freedom 342  
 Full point group C1 NOp 1  
 Largest Abelian subgroup C1 NOp 1  
 Largest concise Abelian subgroup C1 NOp 1

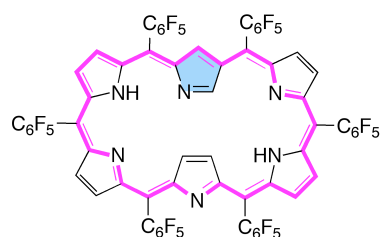

Standard orientation:

| Center Number | Atomic Number | Atomic Type | Coordinates (Angstroms) |           |           |
|---------------|---------------|-------------|-------------------------|-----------|-----------|
|               |               |             | X                       | Y         | Z         |
| 1             | 6             | 0           | 5.020435                | 1.323291  | 0.005557  |
| 2             | 6             | 0           | 5.710596                | 2.497879  | 0.532944  |
| 3             | 6             | 0           | 4.743323                | 3.350889  | 0.930993  |
| 4             | 6             | 0           | 3.465263                | 2.710199  | 0.614324  |
| 5             | 6             | 0           | 2.250158                | 3.393315  | 0.743210  |
| 6             | 6             | 0           | 0.927674                | 2.964924  | 0.434976  |
| 7             | 6             | 0           | 0.350169                | 1.618803  | 0.264140  |
| 8             | 6             | 0           | -1.281199               | 3.014937  | -0.040603 |
| 9             | 6             | 0           | -2.555886               | 3.480261  | -0.360332 |
| 10            | 6             | 0           | -3.720116               | 2.707161  | -0.578401 |
| 11            | 6             | 0           | -4.985281               | 3.220150  | -0.990419 |
| 12            | 6             | 0           | -5.874989               | 2.176396  | -1.030604 |
| 13            | 6             | 0           | -5.181856               | 0.992683  | -0.641385 |
| 14            | 6             | 0           | -5.754647               | -0.293712 | -0.489405 |
| 15            | 6             | 0           | -5.061785               | -1.467523 | -0.178765 |
| 16            | 6             | 0           | -5.702065               | -2.749989 | 0.111064  |
| 17            | 6             | 0           | -4.697586               | -3.611695 | 0.381972  |
| 18            | 6             | 0           | -3.450980               | -2.853900 | 0.224418  |
| 19            | 6             | 0           | -2.168746               | -3.467006 | 0.332591  |
| 20            | 6             | 0           | -0.953157               | -2.920658 | -0.091092 |
| 21            | 6             | 0           | 1.175643                | -2.917046 | -0.483744 |
| 22            | 6             | 0           | 0.665726                | -1.629918 | -0.986129 |
| 23            | 6             | 0           | 2.479082                | -3.469398 | -0.614681 |
| 24            | 6             | 0           | 3.650701                | -2.735755 | -0.807614 |
| 25            | 6             | 0           | 4.927200                | -3.260308 | -1.215592 |
| 26            | 6             | 0           | 5.828776                | -2.238886 | -1.232071 |
| 27            | 6             | 0           | 5.156418                | -1.043329 | -0.795372 |
| 28            | 6             | 0           | 5.724960                | 0.194266  | -0.504259 |
| 29            | 6             | 0           | 2.336644                | 4.821618  | 1.201657  |
| 30            | 6             | 0           | 2.819005                | 5.840183  | 0.374215  |
| 31            | 6             | 0           | 2.870364                | 7.168234  | 0.792868  |
| 32            | 6             | 0           | 2.427466                | 7.504125  | 2.070042  |
| 33            | 6             | 0           | 1.937513                | 6.512363  | 2.917288  |
| 34            | 6             | 0           | 1.892656                | 5.192639  | 2.475243  |
| 35            | 6             | 0           | -2.727918               | 4.963116  | -0.476895 |
| 36            | 6             | 0           | -3.418551               | 5.694295  | 0.495495  |
| 37            | 6             | 0           | -3.576234               | 7.075036  | 0.405482  |
| 38            | 6             | 0           | -3.034435               | 7.758096  | -0.681401 |
| 39            | 6             | 0           | -2.341770               | 7.058217  | -1.667038 |
| 40            | 6             | 0           | -2.195718               | 5.677260  | -1.555703 |
| 41            | 6             | 0           | -7.236520               | -0.381929 | -0.662715 |
| 42            | 6             | 0           | -8.118360               | 0.215428  | 0.245931  |
| 43            | 6             | 0           | -9.500390               | 0.131932  | 0.098219  |
| 44            | 6             | 0           | -10.034682              | -0.568389 | -0.981237 |
| 45            | 6             | 0           | -9.185094               | -1.175337 | -1.903373 |
| 46            | 6             | 0           | -7.805748               | -1.075680 | -1.737071 |
| 47            | 6             | 0           | -2.110569               | -4.842002 | 0.914638  |
| 48            | 6             | 0           | -2.479511               | -5.073651 | 2.243992  |
| 49            | 6             | 0           | -2.375819               | -6.329954 | 2.835751  |
| 50            | 6             | 0           | -1.881074               | -7.398804 | 2.093470  |
| 51            | 6             | 0           | -1.509043               | -7.202186 | 0.765780  |
| 52            | 6             | 0           | -1.637579               | -5.942452 | 0.190526  |
| 53            | 6             | 0           | 2.583629                | -4.949033 | -0.509261 |
| 54            | 6             | 0           | 3.355038                | -5.569912 | 0.480570  |
| 55            | 6             | 0           | 3.385753                | -6.953452 | 0.633466  |
| 56            | 6             | 0           | 2.627072                | -7.755800 | -0.214715 |
| 57            | 6             | 0           | 1.849367                | -7.171204 | -1.212828 |
| 58            | 6             | 0           | 1.844393                | -5.788081 | -1.355795 |
| 59            | 6             | 0           | 7.200300                | 0.325521  | -0.694840 |
| 60            | 6             | 0           | 8.118614                | -0.362819 | 0.106911  |
| 61            | 6             | 0           | 9.494688                | -0.233980 | -0.066585 |
| 62            | 6             | 0           | 9.986014                | 0.609211  | -1.060491 |
| 63            | 6             | 0           | 9.100006                | 1.312962  | -1.873382 |
| 64            | 6             | 0           | 7.728496                | 1.164502  | -1.683972 |
| 65            | 6             | 0           | -0.155875               | 3.822006  | 0.252457  |
| 66            | 6             | 0           | -0.671195               | -1.642851 | -0.756577 |
| 67            | 9             | 0           | 3.248520                | 5.553481  | -0.861381 |
| 68            | 9             | 0           | 3.336774                | 8.119195  | -0.023261 |
| 69            | 9             | 0           | 2.473891                | 8.772684  | 2.481968  |

|     |   |   |            |           |           |
|-----|---|---|------------|-----------|-----------|
| 70  | 9 | 0 | 1.515611   | 6.831918  | 4.145013  |
| 71  | 9 | 0 | 1.416115   | 4.263352  | 3.313075  |
| 72  | 9 | 0 | -3.947882  | 5.066107  | 1.552546  |
| 73  | 9 | 0 | -4.237939  | 7.745841  | 1.353004  |
| 74  | 9 | 0 | -3.179673  | 9.080171  | -0.778661 |
| 75  | 9 | 0 | -1.826952  | 7.712479  | -2.712258 |
| 76  | 9 | 0 | -1.530146  | 5.034325  | -2.522330 |
| 77  | 9 | 0 | -7.638185  | 0.889756  | 1.298612  |
| 78  | 9 | 0 | -10.313949 | 0.711213  | 0.986518  |
| 79  | 9 | 0 | -11.356956 | -0.656511 | -1.131709 |
| 80  | 9 | 0 | -9.696230  | -1.842109 | -2.942791 |
| 81  | 9 | 0 | -7.019697  | -1.665387 | -2.645918 |
| 82  | 9 | 0 | -2.937941  | -4.062793 | 2.997486  |
| 83  | 9 | 0 | -2.736084  | -6.511393 | 4.111910  |
| 84  | 9 | 0 | -1.768758  | -8.607194 | 2.650402  |
| 85  | 9 | 0 | -1.024265  | -8.224191 | 0.047307  |
| 86  | 9 | 0 | -1.297219  | -5.815523 | -1.096599 |
| 87  | 9 | 0 | 4.076513   | -4.830955 | 1.336694  |
| 88  | 9 | 0 | 4.130411   | -7.513145 | 1.594266  |
| 89  | 9 | 0 | 2.651955   | -9.082745 | -0.077785 |
| 90  | 9 | 0 | 1.136242   | -7.942374 | -2.038043 |
| 91  | 9 | 0 | 1.114458   | -5.264337 | -2.344725 |
| 92  | 9 | 0 | 7.682939   | -1.174957 | 1.079507  |
| 93  | 9 | 0 | 10.343367  | -0.905426 | 0.718407  |
| 94  | 9 | 0 | 11.302049  | 0.741399  | -1.234489 |
| 95  | 9 | 0 | 9.570050   | 2.117687  | -2.831578 |
| 96  | 9 | 0 | 6.905016   | 1.851734  | -2.484901 |
| 97  | 1 | 0 | 6.780181   | 2.627959  | 0.607705  |
| 98  | 1 | 0 | 4.872093   | 4.318246  | 1.392299  |
| 99  | 1 | 0 | 3.176384   | -0.703465 | -0.231047 |
| 100 | 1 | 0 | 0.889801   | 0.687572  | 0.371869  |
| 101 | 1 | 0 | -5.182856  | 4.252458  | -1.233999 |
| 102 | 1 | 0 | -6.915341  | 2.218491  | -1.313183 |
| 103 | 1 | 0 | -6.764147  | -2.946120 | 0.121189  |
| 104 | 1 | 0 | -4.773573  | -4.659886 | 0.630563  |
| 105 | 1 | 0 | 1.231842   | -0.874791 | -1.515121 |
| 106 | 1 | 0 | 5.097449   | -4.291029 | -1.487692 |
| 107 | 1 | 0 | 6.868961   | -2.289989 | -1.515229 |
| 108 | 1 | 0 | -1.399839  | -0.889759 | -1.008148 |
| 109 | 1 | 0 | -3.144054  | 0.701576  | -0.117867 |
| 110 | 1 | 0 | -0.141644  | 4.899305  | 0.298052  |
| 111 | 7 | 0 | -0.930038  | 1.643000  | 0.007347  |
| 112 | 7 | 0 | 0.192183   | -3.652454 | 0.047023  |
| 113 | 7 | 0 | 3.676228   | 1.453241  | 0.083625  |
| 114 | 7 | 0 | -3.877992  | 1.350729  | -0.395074 |
| 115 | 7 | 0 | -3.698240  | -1.565972 | -0.095172 |
| 116 | 7 | 0 | 3.835548   | -1.381806 | -0.601609 |

Harmonic frequencies (cm<sup>-1</sup>), IR intensities (KM/Mole), Raman scattering activities (A<sup>4</sup>/AMU), depolarization ratios for plane and unpolarized incident light, reduced masses (AMU), force constants (mDyne/A), and normal coordinates:

|                | 1       | 2       | 3       |
|----------------|---------|---------|---------|
|                | A       | A       | A       |
| Frequencies -- | 3.5825  | 6.1649  | 10.4195 |
| Red. masses -- | 15.0561 | 14.9485 | 15.4292 |
| Frc consts --  | 0.0001  | 0.0003  | 0.0010  |
| IR Inten --    | 0.0258  | 0.0067  | 0.0336  |

E(RB3LYP) = -5848.00462328 A.U.

Stoichiometry C66H16F30N6  
 Framework group C1[X(C66H16F30N6)]  
 Deg. of freedom 348  
 Full point group C1 NOp 1  
 Largest Abelian subgroup C1 NOp 1  
 Largest concise Abelian subgroup C1 NOp 1

Standard orientation:

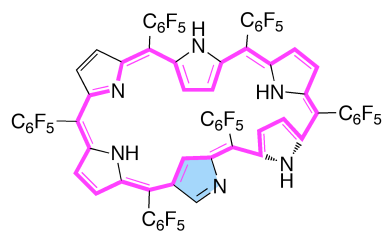

| Center Number | Atomic Number | Atomic Type | Coordinates (Angstroms) |           |           |
|---------------|---------------|-------------|-------------------------|-----------|-----------|
|               |               |             | X                       | Y         | Z         |
| 1             | 6             | 0           | -4.567169               | 1.082123  | -0.792065 |
| 2             | 6             | 0           | -4.998856               | 2.228414  | -1.590437 |
| 3             | 6             | 0           | -3.923630               | 3.045170  | -1.691731 |
| 4             | 6             | 0           | -2.833035               | 2.390587  | -0.970305 |
| 5             | 6             | 0           | -1.567688               | 2.958980  | -0.772831 |
| 6             | 6             | 0           | -0.459236               | 2.284734  | -0.189287 |
| 7             | 6             | 0           | -0.220902               | 0.911563  | 0.032429  |
| 8             | 6             | 0           | 1.057213                | 0.769820  | 0.554854  |
| 9             | 6             | 0           | 1.637501                | 2.058896  | 0.677421  |
| 10            | 6             | 0           | 2.922479                | 2.429717  | 1.196033  |
| 11            | 6             | 0           | 4.016876                | 1.568807  | 1.112870  |
| 12            | 6             | 0           | 5.353460                | 1.698893  | 1.630581  |
| 13            | 6             | 0           | 6.103924                | 0.645737  | 1.180012  |
| 14            | 6             | 0           | 5.275820                | -0.187236 | 0.350450  |
| 15            | 6             | 0           | 5.605527                | -1.294115 | -0.437801 |
| 16            | 6             | 0           | 4.609540                | -2.033729 | -1.151893 |
| 17            | 6             | 0           | 4.691635                | -2.661812 | -2.423104 |
| 18            | 6             | 0           | 3.417025                | -3.072624 | -2.782515 |
| 19            | 6             | 0           | 2.533594                | -2.750750 | -1.720380 |
| 20            | 6             | 0           | 1.142759                | -2.955924 | -1.572056 |
| 21            | 6             | 0           | 0.464264                | -2.771066 | -0.353683 |
| 22            | 6             | 0           | 0.272309                | -2.634279 | 1.808828  |
| 23            | 6             | 0           | -0.930844               | -2.801440 | -0.094487 |
| 24            | 6             | 0           | -1.084734               | -2.732756 | 1.292407  |
| 25            | 6             | 0           | -2.288768               | -2.822748 | 2.075514  |
| 26            | 6             | 0           | -3.504807               | -2.302808 | 1.635630  |
| 27            | 6             | 0           | -4.841931               | -2.694887 | 1.993530  |
| 28            | 6             | 0           | -5.721146               | -1.959912 | 1.247194  |
| 29            | 6             | 0           | -4.963544               | -1.025577 | 0.455763  |
| 30            | 6             | 0           | -5.421405               | 0.044161  | -0.326948 |
| 31            | 6             | 0           | 3.113212                | 3.757431  | 1.850732  |
| 32            | 6             | 0           | 2.976204                | 4.971338  | 1.169144  |
| 33            | 6             | 0           | 3.131908                | 6.208521  | 1.786231  |
| 34            | 6             | 0           | 3.458691                | 6.260966  | 3.138640  |
| 35            | 6             | 0           | 3.609151                | 5.076057  | 3.854772  |
| 36            | 6             | 0           | 3.428475                | 3.852571  | 3.214019  |
| 37            | 6             | 0           | 7.024373                | -1.661874 | -0.648917 |
| 38            | 6             | 0           | 7.986464                | -0.749985 | -1.111199 |
| 39            | 6             | 0           | 9.314999                | -1.111707 | -1.317136 |
| 40            | 6             | 0           | 9.718019                | -2.423554 | -1.080509 |
| 41            | 6             | 0           | 8.789434                | -3.360722 | -0.633210 |
| 42            | 6             | 0           | 7.469186                | -2.974965 | -0.422673 |
| 43            | 6             | 0           | 0.375506                | -3.388675 | -2.770532 |
| 44            | 6             | 0           | 0.319617                | -2.599503 | -3.927906 |
| 45            | 6             | 0           | -0.400692               | -2.987302 | -5.054256 |
| 46            | 6             | 0           | -1.092047               | -4.196397 | -5.045591 |
| 47            | 6             | 0           | -1.056912               | -5.006168 | -3.912925 |
| 48            | 6             | 0           | -0.330158               | -4.599770 | -2.796747 |
| 49            | 6             | 0           | -2.240310               | -3.530977 | 3.373885  |
| 50            | 6             | 0           | -1.608751               | -4.780763 | 3.512632  |
| 51            | 6             | 0           | -1.532239               | -5.445471 | 4.732642  |
| 52            | 6             | 0           | -2.097236               | -4.871622 | 5.869023  |
| 53            | 6             | 0           | -2.731006               | -3.635207 | 5.773814  |
| 54            | 6             | 0           | -2.792810               | -2.982900 | 4.546133  |
| 55            | 6             | 0           | -6.882090               | 0.117106  | -0.601973 |
| 56            | 6             | 0           | -7.530936               | -0.875607 | -1.349204 |
| 57            | 6             | 0           | -8.896683               | -0.833688 | -1.616825 |
| 58            | 6             | 0           | -9.658708               | 0.228252  | -1.136435 |
| 59            | 6             | 0           | -9.048883               | 1.233216  | -0.389579 |
| 60            | 6             | 0           | -7.683088               | 1.164289  | -0.126249 |
| 61            | 6             | 0           | -1.359063               | 4.381789  | -1.174497 |
| 62            | 6             | 0           | -0.435310               | 4.731198  | -2.170686 |
| 63            | 6             | 0           | -0.224415               | 6.051226  | -2.559790 |
| 64            | 6             | 0           | -0.949399               | 7.071174  | -1.947404 |
| 65            | 6             | 0           | -1.872888               | 6.762577  | -0.951526 |
| 66            | 6             | 0           | -2.063591               | 5.435063  | -0.574154 |
| 67            | 9             | 0           | 2.651282                | 4.970613  | -0.143774 |
| 68            | 9             | 0           | 2.982872                | 7.338046  | 1.087563  |
| 69            | 9             | 0           | 3.621396                | 7.437645  | 3.744604  |

|     |   |   |            |           |           |
|-----|---|---|------------|-----------|-----------|
| 70  | 9 | 0 | 3.913156   | 5.118901  | 5.155172  |
| 71  | 9 | 0 | 3.573003   | 2.740918  | 3.948406  |
| 72  | 9 | 0 | 7.640865   | 0.516124  | -1.387090 |
| 73  | 9 | 0 | 10.199964  | -0.212354 | -1.761318 |
| 74  | 9 | 0 | 10.988038  | -2.780886 | -1.280584 |
| 75  | 9 | 0 | 9.174427   | -4.618967 | -0.395385 |
| 76  | 9 | 0 | 6.614480   | -3.902341 | 0.027980  |
| 77  | 9 | 0 | 0.957278   | -1.422077 | -3.970920 |
| 78  | 9 | 0 | -0.439297  | -2.204017 | -6.137277 |
| 79  | 9 | 0 | -1.784029  | -4.579056 | -6.119921 |
| 80  | 9 | 0 | -1.709460  | -6.172960 | -3.907960 |
| 81  | 9 | 0 | 0.273074   | 3.775350  | -2.787744 |
| 82  | 9 | 0 | -0.304784  | -5.418022 | -1.738921 |
| 83  | 9 | 0 | -1.078185  | -5.391618 | 2.446201  |
| 84  | 9 | 0 | -0.936224  | -6.639674 | 4.816472  |
| 85  | 9 | 0 | -2.032960  | -5.503480 | 7.042409  |
| 86  | 9 | 0 | -3.260208  | -3.072882 | 6.866176  |
| 87  | 9 | 0 | -3.381092  | -1.779341 | 4.521119  |
| 88  | 9 | 0 | -6.831929  | -1.910270 | -1.838273 |
| 89  | 9 | 0 | -9.477157  | -1.798990 | -2.339335 |
| 90  | 9 | 0 | -10.968833 | 0.282204  | -1.389417 |
| 91  | 9 | 0 | -9.780872  | 2.248106  | 0.084173  |
| 92  | 9 | 0 | 0.657933   | 6.343725  | -3.520498 |
| 93  | 9 | 0 | -7.142476  | 2.140426  | 0.614848  |
| 94  | 9 | 0 | -0.758170  | 8.339803  | -2.313029 |
| 95  | 9 | 0 | -2.560815  | 7.741862  | -0.355381 |
| 96  | 9 | 0 | -2.946784  | 5.185984  | 0.399182  |
| 97  | 1 | 0 | 0.857513   | 3.925564  | 0.073864  |
| 98  | 1 | 0 | 3.281233   | 0.138534  | -0.254930 |
| 99  | 1 | 0 | -0.917562  | 0.124967  | -0.197418 |
| 100 | 1 | 0 | 1.493147   | -0.153618 | 0.901595  |
| 101 | 1 | 0 | 5.691335   | 2.497677  | 2.273260  |
| 102 | 1 | 0 | 7.143841   | 0.453242  | 1.398356  |
| 103 | 1 | 0 | 5.587578   | -2.725566 | -3.023457 |
| 104 | 1 | 0 | 3.129636   | -3.549918 | -3.708026 |
| 105 | 1 | 0 | 0.548767   | -2.538435 | 2.854100  |
| 106 | 1 | 0 | -1.718727  | -2.919994 | -0.824153 |
| 107 | 1 | 0 | -5.080236  | -3.489277 | 2.686060  |
| 108 | 1 | 0 | -6.798967  | -2.027187 | 1.257415  |
| 109 | 1 | 0 | -5.983961  | 2.380005  | -2.007872 |
| 110 | 1 | 0 | -3.862008  | 3.989025  | -2.214582 |
| 111 | 7 | 0 | -3.255202  | 1.183467  | -0.469169 |
| 112 | 7 | 0 | 0.680874   | 2.947510  | 0.238692  |
| 113 | 7 | 0 | 4.017279   | 0.387435  | 0.389807  |
| 114 | 7 | 0 | 3.296841   | -2.113479 | -0.756606 |
| 115 | 1 | 0 | 2.926071   | -2.066812 | 0.197217  |
| 116 | 7 | 0 | 1.175529   | -2.614198 | 0.858982  |
| 117 | 7 | 0 | -3.640261  | -1.303197 | 0.684552  |
| 118 | 1 | 0 | -2.939060  | -0.617049 | 0.403048  |

-----  
 Harmonic frequencies (cm<sup>-1</sup>), IR intensities (KM/Mole), Raman scattering activities (A<sup>4</sup>/AMU), depolarization ratios for plane and unpolarized incident light, reduced masses (AMU), force constants (mDyne/A), and normal coordinates:

|                | 1       | 2       | 3       |
|----------------|---------|---------|---------|
|                | A       | A       | A       |
| Frequencies -- | 6.8744  | 8.7787  | 10.0488 |
| Red. masses -- | 15.3426 | 15.2655 | 15.0522 |
| Frc consts --  | 0.0004  | 0.0007  | 0.0009  |
| IR Inten --    | 0.0054  | 0.0032  | 0.0036  |



E(RB3LYP) = -5848.00816863 A.U.

Stoichiometry C66H16F30N6  
 Framework group C1[X(C66H16F30N6)]  
 Deg. of freedom 348  
 Full point group C1 NOp 1  
 Largest Abelian subgroup C1 NOp 1  
 Largest concise Abelian subgroup C1 NOp 1

Standard orientation:

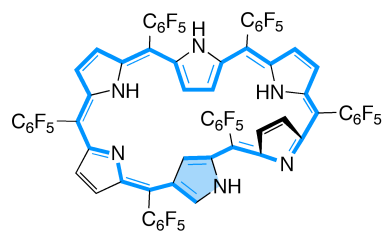

| Center Number | Atomic Number | Atomic Type | Coordinates (Angstroms) |           |           |
|---------------|---------------|-------------|-------------------------|-----------|-----------|
|               |               |             | X                       | Y         | Z         |
| 1             | 6             | 0           | -4.628697               | 1.242040  | -0.795432 |
| 2             | 6             | 0           | -4.976123               | 2.388217  | -1.603555 |
| 3             | 6             | 0           | -3.882126               | 3.194659  | -1.688551 |
| 4             | 6             | 0           | -2.795915               | 2.583075  | -0.955089 |
| 5             | 6             | 0           | -1.516003               | 3.087096  | -0.765886 |
| 6             | 6             | 0           | -0.441601               | 2.355118  | -0.162543 |
| 7             | 6             | 0           | -0.256228               | 0.977000  | 0.059547  |
| 8             | 6             | 0           | 1.022580                | 0.793640  | 0.586340  |
| 9             | 6             | 0           | 1.644042                | 2.052517  | 0.705424  |
| 10            | 6             | 0           | 2.957624                | 2.394456  | 1.187110  |
| 11            | 6             | 0           | 4.034321                | 1.524403  | 1.071426  |
| 12            | 6             | 0           | 5.412409                | 1.716035  | 1.471407  |
| 13            | 6             | 0           | 6.149195                | 0.659645  | 1.022572  |
| 14            | 6             | 0           | 5.266218                | -0.243134 | 0.318947  |
| 15            | 6             | 0           | 5.544575                | -1.385465 | -0.432568 |
| 16            | 6             | 0           | 4.494744                | -2.119517 | -1.085029 |
| 17            | 6             | 0           | 4.635357                | -2.919718 | -2.295932 |
| 18            | 6             | 0           | 3.375445                | -3.259161 | -2.683457 |
| 19            | 6             | 0           | 2.475733                | -2.733351 | -1.670463 |
| 20            | 6             | 0           | 1.103644                | -2.939210 | -1.565279 |
| 21            | 6             | 0           | 0.385757                | -2.722987 | -0.339153 |
| 22            | 6             | 0           | 0.165949                | -2.622720 | 1.896805  |
| 23            | 6             | 0           | -0.978024               | -2.654840 | -0.052906 |
| 24            | 6             | 0           | -1.134024               | -2.597051 | 1.357974  |
| 25            | 6             | 0           | -2.363994               | -2.626848 | 2.128352  |
| 26            | 6             | 0           | -3.541586               | -2.040952 | 1.697523  |
| 27            | 6             | 0           | -4.883135               | -2.368755 | 2.173455  |
| 28            | 6             | 0           | -5.745592               | -1.658563 | 1.407419  |
| 29            | 6             | 0           | -4.922268               | -0.833331 | 0.520178  |
| 30            | 6             | 0           | -5.433405               | 0.205446  | -0.329554 |
| 31            | 6             | 0           | 3.190606                | 3.715948  | 1.842575  |
| 32            | 6             | 0           | 3.067841                | 4.938677  | 1.174403  |
| 33            | 6             | 0           | 3.265861                | 6.166405  | 1.798290  |
| 34            | 6             | 0           | 3.623362                | 6.199424  | 3.143498  |
| 35            | 6             | 0           | 3.761493                | 5.005139  | 3.846386  |
| 36            | 6             | 0           | 3.538991                | 3.791840  | 3.199318  |
| 37            | 6             | 0           | 6.949248                | -1.807404 | -0.649712 |
| 38            | 6             | 0           | 7.926145                | -0.960674 | -1.194658 |
| 39            | 6             | 0           | 9.239662                | -1.374362 | -1.400676 |
| 40            | 6             | 0           | 9.611401                | -2.677432 | -1.080229 |
| 41            | 6             | 0           | 8.666457                | -3.552579 | -0.549907 |
| 42            | 6             | 0           | 7.362796                | -3.112813 | -0.340868 |
| 43            | 6             | 0           | 0.340237                | -3.443115 | -2.733075 |
| 44            | 6             | 0           | 0.344302                | -2.758889 | -3.958454 |
| 45            | 6             | 0           | -0.379181               | -3.208963 | -5.059585 |
| 46            | 6             | 0           | -1.134976               | -4.374078 | -4.958803 |
| 47            | 6             | 0           | -1.160911               | -5.080412 | -3.758276 |
| 48            | 6             | 0           | -0.430241               | -4.614706 | -2.669324 |
| 49            | 6             | 0           | -2.343783               | -3.364868 | 3.415967  |
| 50            | 6             | 0           | -1.867334               | -4.684176 | 3.506069  |
| 51            | 6             | 0           | -1.821798               | -5.378033 | 4.711255  |
| 52            | 6             | 0           | -2.257913               | -4.758767 | 5.880466  |
| 53            | 6             | 0           | -2.734388               | -3.451264 | 5.832360  |
| 54            | 6             | 0           | -2.772112               | -2.773555 | 4.616559  |
| 55            | 6             | 0           | -6.884183               | 0.211588  | -0.647543 |
| 56            | 6             | 0           | -7.479063               | -0.870710 | -1.312855 |
| 57            | 6             | 0           | -8.838045               | -0.907678 | -1.611133 |
| 58            | 6             | 0           | -9.651330               | 0.163262  | -1.248128 |
| 59            | 6             | 0           | -9.097685               | 1.255479  | -0.585456 |
| 60            | 6             | 0           | -7.737444               | 1.263949  | -0.286492 |
| 61            | 6             | 0           | -1.237502               | 4.480555  | -1.214618 |
| 62            | 6             | 0           | -0.270103               | 4.752345  | -2.194839 |
| 63            | 6             | 0           | 0.017402                | 6.047266  | -2.617272 |
| 64            | 6             | 0           | -0.676830               | 7.120738  | -2.063046 |
| 65            | 6             | 0           | -1.645228               | 6.889921  | -1.089012 |
| 66            | 6             | 0           | -1.909109               | 5.586720  | -0.673421 |
| 67            | 9             | 0           | 2.716601                | 4.958715  | -0.131992 |
| 68            | 9             | 0           | 3.128790                | 7.305391  | 1.112278  |
| 69            | 9             | 0           | 3.826880                | 7.366887  | 3.755218  |

|     |   |   |            |           |           |
|-----|---|---|------------|-----------|-----------|
| 70  | 9 | 0 | 4.095041   | 5.029667  | 5.140123  |
| 71  | 9 | 0 | 3.673236   | 2.671210  | 3.921040  |
| 72  | 9 | 0 | 7.611405   | 0.294306  | -1.550018 |
| 73  | 9 | 0 | 10.139698  | -0.534068 | -1.924459 |
| 74  | 9 | 0 | 10.866938  | -3.085411 | -1.279717 |
| 75  | 9 | 0 | 9.020216   | -4.802840 | -0.231681 |
| 76  | 9 | 0 | 6.489953   | -3.982041 | 0.188004  |
| 77  | 9 | 0 | 1.039197   | -1.623059 | -4.096606 |
| 78  | 9 | 0 | -0.359434  | -2.524741 | -6.208447 |
| 79  | 9 | 0 | -1.829314  | -4.814533 | -6.009249 |
| 80  | 9 | 0 | -1.871872  | -6.208783 | -3.664474 |
| 81  | 9 | 0 | 0.406478   | 3.744195  | -2.759998 |
| 82  | 9 | 0 | -0.459236  | -5.341299 | -1.545731 |
| 83  | 9 | 0 | -1.463986  | -5.330863 | 2.405438  |
| 84  | 9 | 0 | -1.376646  | -6.638618 | 4.751361  |
| 85  | 9 | 0 | -2.219591  | -5.415651 | 7.041185  |
| 86  | 9 | 0 | -3.139243  | -2.849014 | 6.955997  |
| 87  | 9 | 0 | -3.209869  | -1.508219 | 4.631604  |
| 88  | 9 | 0 | -6.728832  | -1.915182 | -1.690718 |
| 89  | 9 | 0 | -9.364129  | -1.956105 | -2.254682 |
| 90  | 9 | 0 | -10.955451 | 0.142603  | -1.534704 |
| 91  | 9 | 0 | -9.877537  | 2.280817  | -0.222789 |
| 92  | 9 | 0 | 0.940736   | 6.265027  | -3.558456 |
| 93  | 9 | 0 | -7.256138  | 2.325411  | 0.377520  |
| 94  | 9 | 0 | -0.414595  | 8.365367  | -2.464327 |
| 95  | 9 | 0 | -2.305093  | 7.919480  | -0.548705 |
| 96  | 9 | 0 | -2.834937  | 5.413089  | 0.278136  |
| 97  | 1 | 0 | -2.854930  | 0.696064  | 0.129423  |
| 98  | 1 | 0 | 0.928312   | 3.945784  | 0.100404  |
| 99  | 1 | 0 | 3.221861   | -0.144376 | -0.036486 |
| 100 | 1 | 0 | 2.064948   | -2.602373 | 0.918077  |
| 101 | 1 | 0 | -0.950891  | 0.186016  | -0.174009 |
| 102 | 1 | 0 | 1.437403   | -0.145820 | 0.910754  |
| 103 | 1 | 0 | 5.781341   | 2.574975  | 2.011800  |
| 104 | 1 | 0 | 7.211963   | 0.513598  | 1.143990  |
| 105 | 1 | 0 | 5.563426   | -3.144487 | -2.803311 |
| 106 | 1 | 0 | 3.087462   | -3.848009 | -3.543313 |
| 107 | 1 | 0 | 0.485514   | -2.582668 | 2.927975  |
| 108 | 1 | 0 | -1.783888  | -2.673094 | -0.769900 |
| 109 | 1 | 0 | -5.123003  | -3.092508 | 2.939921  |
| 110 | 1 | 0 | -6.825598  | -1.656223 | 1.457385  |
| 111 | 1 | 0 | -5.943971  | 2.556427  | -2.051007 |
| 112 | 1 | 0 | -3.805327  | 4.128703  | -2.225061 |
| 113 | 7 | 0 | -3.299605  | 1.391516  | -0.467213 |
| 114 | 7 | 0 | 0.715437   | 2.976153  | 0.271651  |
| 115 | 7 | 0 | 4.007689   | 0.302917  | 0.427159  |
| 116 | 7 | 0 | 3.203478   | -2.039344 | -0.715196 |
| 117 | 7 | 0 | 1.050724   | -2.680425 | 0.885455  |
| 118 | 7 | 0 | -3.616455  | -1.089785 | 0.689560  |

Harmonic frequencies (cm<sup>-1</sup>), IR intensities (KM/Mole), Raman scattering activities (A<sup>4</sup>/AMU), depolarization ratios for plane and unpolarized incident light, reduced masses (AMU), force constants (mDyne/A), and normal coordinates:

|                | 1       | 2       | 3       |
|----------------|---------|---------|---------|
|                | A       | A       | A       |
| Frequencies -- | 7.3951  | 8.0127  | 9.5064  |
| Red. masses -- | 15.3863 | 15.1071 | 15.0701 |
| Frc consts --  | 0.0005  | 0.0006  | 0.0008  |
| IR Inten --    | 0.0123  | 0.0060  | 0.0064  |

E(RB3LYP) = -5973.53413932 A.U.

Stoichiometry C66H14F30N6Pd  
 Framework group C1[X(C66H14F30N6Pd)]  
 Deg. of freedom 345  
 Full point group C1 NOp 1  
 Largest Abelian subgroup C1 NOp 1  
 Largest concise Abelian subgroup C1 NOp 1

Standard orientation:

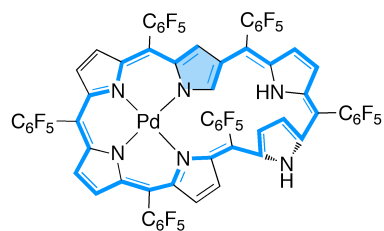

| Center Number | Atomic Number | Atomic Type | Coordinates (Angstroms) |           |           |
|---------------|---------------|-------------|-------------------------|-----------|-----------|
|               |               |             | X                       | Y         | Z         |
| 1             | 6             | 0           | -4.120544               | 1.324632  | -0.510553 |
| 2             | 6             | 0           | -4.468199               | 2.609331  | -1.068724 |
| 3             | 6             | 0           | -3.330385               | 3.359293  | -1.100173 |
| 4             | 6             | 0           | -2.269036               | 2.552156  | -0.554164 |
| 5             | 6             | 0           | -0.962087               | 2.972219  | -0.296249 |
| 6             | 6             | 0           | 0.066604                | 2.166237  | 0.241470  |
| 7             | 6             | 0           | 1.260638                | 2.611912  | 0.851004  |
| 8             | 6             | 0           | 1.963544                | 1.483175  | 1.281662  |
| 9             | 6             | 0           | 1.145626                | 0.368956  | 0.905478  |
| 10            | 6             | 0           | 3.229231                | 1.453319  | 2.020369  |
| 11            | 6             | 0           | 4.260056                | 0.628797  | 1.622080  |
| 12            | 6             | 0           | 5.545366                | 0.308899  | 2.201803  |
| 13            | 6             | 0           | 6.222053                | -0.513483 | 1.346795  |
| 14            | 6             | 0           | 5.398000                | -0.760618 | 0.184184  |
| 15            | 6             | 0           | 5.628488                | -1.486910 | -0.982916 |
| 16            | 6             | 0           | 4.512411                | -1.724959 | -1.875013 |
| 17            | 6             | 0           | 4.369265                | -1.594053 | -3.275255 |
| 18            | 6             | 0           | 3.004559                | -1.593176 | -3.572801 |
| 19            | 6             | 0           | 2.290142                | -1.781813 | -2.369072 |
| 20            | 6             | 0           | 0.908982                | -1.754621 | -2.025414 |
| 21            | 6             | 0           | 0.458070                | -2.445678 | -0.885840 |
| 22            | 6             | 0           | 0.982170                | -3.711777 | -0.417830 |
| 23            | 6             | 0           | 0.070803                | -4.225010 | 0.460943  |
| 24            | 6             | 0           | -1.005434               | -3.268410 | 0.567548  |
| 25            | 6             | 0           | -2.263927               | -3.488027 | 1.182024  |
| 26            | 6             | 0           | -3.379539               | -2.676222 | 0.943526  |
| 27            | 6             | 0           | -4.749546               | -2.973767 | 1.320604  |
| 28            | 6             | 0           | -5.528658               | -1.965600 | 0.853344  |
| 29            | 6             | 0           | -4.649990               | -0.989752 | 0.233820  |
| 30            | 6             | 0           | -5.030263               | 0.268909  | -0.237399 |
| 31            | 6             | 0           | -0.622333               | 4.402158  | -0.548695 |
| 32            | 6             | 0           | -1.208651               | 5.447804  | 0.174532  |
| 33            | 6             | 0           | -0.876170               | 6.780489  | -0.058524 |
| 34            | 6             | 0           | 0.067820                | 7.093747  | -1.033792 |
| 35            | 6             | 0           | 0.672821                | 6.075476  | -1.767859 |
| 36            | 6             | 0           | 0.327552                | 4.749973  | -1.518107 |
| 37            | 6             | 0           | 3.405294                | 2.393603  | 3.147614  |
| 38            | 6             | 0           | 2.437145                | 2.489229  | 4.163626  |
| 39            | 6             | 0           | 2.556140                | 3.382941  | 5.222648  |
| 40            | 6             | 0           | 3.668286                | 4.219570  | 5.299638  |
| 41            | 6             | 0           | 4.647166                | 4.156019  | 4.311680  |
| 42            | 6             | 0           | 4.506727                | 3.258981  | 3.255868  |
| 43            | 6             | 0           | 6.975081                | -1.935418 | -1.376420 |
| 44            | 6             | 0           | 8.104653                | -1.099575 | -1.331624 |
| 45            | 6             | 0           | 9.367675                | -1.533092 | -1.725071 |
| 46            | 6             | 0           | 9.537687                | -2.830760 | -2.201418 |
| 47            | 6             | 0           | 8.440052                | -3.686154 | -2.273059 |
| 48            | 6             | 0           | 7.189321                | -3.238451 | -1.861604 |
| 49            | 6             | 0           | -0.020578               | -0.971858 | -2.865744 |
| 50            | 6             | 0           | 0.246997                | 0.360134  | -3.224025 |
| 51            | 6             | 0           | -0.642381               | 1.112592  | -3.983571 |
| 52            | 6             | 0           | -1.835416               | 0.538039  | -4.417018 |
| 53            | 6             | 0           | -2.128802               | -0.784070 | -4.090129 |
| 54            | 6             | 0           | -1.228040               | -1.520715 | -3.328914 |
| 55            | 6             | 0           | -2.415068               | -4.713869 | 2.015086  |
| 56            | 6             | 0           | -1.759943               | -4.823227 | 3.248150  |
| 57            | 6             | 0           | -1.860637               | -5.962041 | 4.043366  |
| 58            | 6             | 0           | -2.636775               | -7.035117 | 3.610817  |
| 59            | 6             | 0           | -3.299641               | -6.961474 | 2.387816  |
| 60            | 6             | 0           | -3.176549               | -5.815122 | 1.605747  |
| 61            | 6             | 0           | -6.485569               | 0.538017  | -0.401840 |
| 62            | 6             | 0           | -7.154109               | 1.502124  | 0.364545  |
| 63            | 6             | 0           | -8.515140               | 1.754535  | 0.212943  |
| 64            | 6             | 0           | -9.250092               | 1.026783  | -0.720725 |
| 65            | 6             | 0           | -8.618936               | 0.056598  | -1.495674 |
| 66            | 6             | 0           | -7.255224               | -0.174825 | -1.331192 |
| 67            | 9             | 0           | -2.106766               | 5.184984  | 1.131888  |
| 68            | 9             | 0           | -1.449299               | 7.757047  | 0.652524  |
| 69            | 9             | 0           | 0.392734                | 8.367037  | -1.264718 |

|     |    |   |            |           |           |
|-----|----|---|------------|-----------|-----------|
| 70  | 9  | 0 | 1.575301   | 6.377281  | -2.706964 |
| 71  | 9  | 0 | 0.922294   | 3.797955  | -2.245869 |
| 72  | 9  | 0 | 1.365807   | 1.687462  | 4.146125  |
| 73  | 9  | 0 | 1.620836   | 3.431398  | 6.176738  |
| 74  | 9  | 0 | 3.794551   | 5.075137  | 6.315979  |
| 75  | 9  | 0 | 5.709414   | 4.967131  | 4.372251  |
| 76  | 9  | 0 | 5.461443   | 3.266312  | 2.312712  |
| 77  | 9  | 0 | 7.990724   | 0.171982  | -0.920190 |
| 78  | 9  | 0 | 10.414088  | -0.702032 | -1.668728 |
| 79  | 9  | 0 | 10.743811  | -3.253128 | -2.585731 |
| 80  | 9  | 0 | 8.598832   | -4.937379 | -2.717753 |
| 81  | 9  | 0 | 6.168770   | -4.106573 | -1.921259 |
| 82  | 9  | 0 | 1.355513   | 0.969415  | -2.781333 |
| 83  | 9  | 0 | -0.372749  | 2.387892  | -4.282366 |
| 84  | 9  | 0 | -2.696510  | 1.254723  | -5.141024 |
| 85  | 9  | 0 | -3.271473  | -1.335598 | -4.509601 |
| 86  | 9  | 0 | -1.544008  | -2.788735 | -3.045934 |
| 87  | 9  | 0 | -1.008900  | -3.808066 | 3.697281  |
| 88  | 9  | 0 | -1.225126  | -6.028993 | 5.218199  |
| 89  | 9  | 0 | -2.744561  | -8.130733 | 4.365646  |
| 90  | 9  | 0 | -4.037840  | -7.994085 | 1.966411  |
| 91  | 9  | 0 | -3.816260  | -5.789066 | 0.428136  |
| 92  | 9  | 0 | -6.485027  | 2.207961  | 1.285448  |
| 93  | 9  | 0 | -9.122923  | 2.678397  | 0.965132  |
| 94  | 9  | 0 | -10.556029 | 1.257961  | -0.870573 |
| 95  | 9  | 0 | -9.322458  | -0.638716 | -2.395684 |
| 96  | 9  | 0 | -6.681716  | -1.107785 | -2.102070 |
| 97  | 1  | 0 | -5.454958  | 2.899599  | -1.398032 |
| 98  | 1  | 0 | 3.561112   | 0.171441  | -0.298225 |
| 99  | 1  | 0 | 3.027336   | -2.006918 | -0.402812 |
| 100 | 1  | 0 | 1.561962   | 3.642710  | 0.968668  |
| 101 | 1  | 0 | 1.315822   | -0.676389 | 1.123900  |
| 102 | 1  | 0 | 5.882433   | 0.650868  | 3.169673  |
| 103 | 1  | 0 | 7.200112   | -0.944768 | 1.504090  |
| 104 | 1  | 0 | 5.183407   | -1.438680 | -3.968786 |
| 105 | 1  | 0 | 2.554689   | -1.473541 | -4.548154 |
| 106 | 1  | 0 | 1.850991   | -4.211568 | -0.823469 |
| 107 | 1  | 0 | 0.085721   | -5.201983 | 0.922311  |
| 108 | 1  | 0 | -5.069355  | -3.851598 | 1.861685  |
| 109 | 1  | 0 | -6.599610  | -1.862488 | 0.950724  |
| 110 | 1  | 0 | -3.222762  | 4.372146  | -1.459546 |
| 111 | 7  | 0 | -2.787485  | 1.311107  | -0.225024 |
| 112 | 7  | 0 | 0.023744   | 0.769895  | 0.295229  |
| 113 | 7  | 0 | 4.211366   | -0.084569 | 0.430219  |
| 114 | 7  | 0 | 3.248844   | -1.902632 | -1.380917 |
| 115 | 7  | 0 | -0.706134  | -2.177607 | -0.188534 |
| 116 | 7  | 0 | -3.368972  | -1.471909 | 0.276675  |
| 117 | 46 | 0 | -1.686767  | -0.382467 | -0.005512 |

Harmonic frequencies (cm<sup>-1</sup>), IR intensities (KM/Mole), Raman scattering activities (A<sup>4</sup>/AMU), depolarization ratios for plane and unpolarized incident light, reduced masses (AMU), force constants (mDyne/A), and normal coordinates:

|                | 1       | 2       | 3       |
|----------------|---------|---------|---------|
|                | A       | A       | A       |
| Frequencies -- | 8.6801  | 9.9565  | 12.0028 |
| Red. masses -- | 15.4250 | 15.5535 | 15.4293 |
| Frc consts --  | 0.0007  | 0.0009  | 0.0013  |
| IR Inten --    | 0.0062  | 0.0081  | 0.0281  |
